1 **Embigin deficiency leads to delayed embryonic lung development and**  
2 **high neonatal mortality**

3

4 Salli Talvi<sup>1,2</sup>, Johanna Jokinen<sup>1,2</sup>, Kalle Sipilä<sup>1,3</sup>, Pekka Rappu<sup>1</sup>, Fu-Ping Zhang<sup>4, 5, 6</sup>, Matti  
5 Poutanen<sup>4,5</sup>, Pia Rantakari<sup>7,8</sup>, Jyrki Heino<sup>1,2\*</sup>

6

7 <sup>1</sup>Department of Life Technologies, University of Turku, FI-20014 Turku, Finland; <sup>2</sup>Medicity  
8 Research Laboratory, University of Turku, FI-20520 Turku, Finland; <sup>3</sup>Centre for Stem Cells  
9 and Regenerative Medicine, King's College London WC2R2LS, UK; <sup>4</sup>Institute of  
10 Biomedicine, Research Centre for Integrative Physiology and Pharmacology, University of  
11 Turku, FI-20014 Turku, Finland; <sup>5</sup>Turku Center for Disease Modeling, University of Turku,  
12 FI-200140 Turku, Finland; <sup>6</sup>Helsinki Institute of Life Science, University of Helsinki, FI-00260  
13 Helsinki, Finland; <sup>7</sup>Institute of Biomedicine, University of Turku, FI-20014 Turku, Finland.;  
14 <sup>8</sup>Turku Bioscience Centre, University of Turku and Åbo Akademi University, FI-20520 Turku,  
15 Finland.

16 \*Corresponding author. Tel: +358 505238351; E-mail: [jyrki.heino@utu.fi](mailto:jyrki.heino@utu.fi)

17

18

19

20

21

22

23

24

25 Key words: Basigin-like proteins / Embigin / Embryonic development / Lung morphogenesis

26 Running title: Embigin in mouse embryonic development

## 27 **Summary statement**

28 Embigin is a basigin-group transmembrane glycoprotein. *In vivo* mouse model shows that  
29 embigin is crucial for embryonic lung development and neonatal survival.

30

31

32

## 33 **Abstract**

34 Embigin (gp70), a transmembrane glycoprotein, has been shown to regulate hematopoietic  
35 stem cell and progenitor cell niche. Still, little is known about its expression and function in  
36 other organ systems during development or adulthood. By combining immunofluorescence,  
37 RNA sequencing, and *in vivo* mouse models, we show that embigin is highly expressed  
38 during development and in adult lung, kidney, epididymis, skin, and testis. Adult *Emb<sup>-/-</sup>* mice  
39 have a normal lifespan and fertility without apparent pathologies. In contrast, the *Emb<sup>-/-</sup>*  
40 embryos are significantly smaller than their WT littermates. Markedly increased mortality of  
41 the *Emb<sup>-/-</sup>* embryos is seen especially during the neonatal period. Embigin is present in the  
42 placenta, but placental morphology and gene expression patterns stay unaltered. At E17.5,  
43 *Emb<sup>-/-</sup>* mice show defective morphogenesis of the lung, low alkaline phosphatase activity in  
44 amniotic fluid, and remarkable activation of genes involved in cell proliferation in the lungs.  
45 Thus, lung underdevelopment explains the high neonatal mortality. Our work demonstrates  
46 the crucial role of embigin during development, and it paves the way to further  
47 characterization of embigin in specific organ systems in development and homeostasis.

## 48 **Introduction**

49 Embigin (gp70) is a highly glycosylated member of the basigin subgroup that belongs to the  
50 immunoglobulin superfamily (Huang et al., 1993; Ozawa et al., 1988). In addition to embigin,  
51 the group includes two other type I membrane proteins, namely basigin (EMMPRIN/CD147)  
52 and neuroplastin (Np65/gp65 and Np55/gp55). These three proteins have evolutionarily  
53 conserved domains, and they are proposed to be involved in similar cellular functions,  
54 including the regulation of cell adhesion, migration, and metabolism (Muramatsu and  
55 Miyauchi, 2003; Williams and Barclay, 1988). In this study, we will focus on embigin, the least  
56 known member of the basigin group.

57 Structurally, all three members of basigin subgroup resemble each other, having an amino  
58 acid sequence identity of 37% - 46% (Hanna et al., 2003). They share the overall structure  
59 possessing an extracellular immunoglobulin-like (Ig-like) domain, a single hydrophobic  
60 transmembrane domain, and a short cytoplasmic tail. However, there are also significant  
61 structural differences that most probably contribute to the biological roles of the proteins, for  
62 example, both basigin-1 and neuroplastin Np65 are composed of three Ig-like domains,  
63 while basigin-2, embigin, and neuroplastin Np55 have only two. The other two basigin  
64 isoforms found in human, basigin-3 and basigin-4, are structurally small and they comprise  
65 only one Ig-like domain (Liao, C. et al., 2011). In addition to the variability in the number and  
66 the sequence of the Ig-like domains, the N-glycosylation state of these highly glycosylated  
67 proteins may define the function of the protein (Langnaese et al., 1997; Ochrietor et al.,  
68 2003; Yoshida et al., 2000; Yu et al., 2008).

69 Now, more than 30 years after the first discovery of embigin, knowledge of the protein  
70 expression patterns in both mouse and human tissues is still dispersed and partly  
71 incoherent. As an example, the embigin protein expression pattern is not available through  
72 the Human Protein Atlas because the existing data provide inconclusive results. However,  
73 strong embigin mRNA expression has been localized to mouse embryos during the early  
74 phases of the development (Fan et al., 1998; Huang et al., 1990). In adult mice and rats, only  
75 low levels of embigin mRNA have been reported in several organs (Guenette et al.,  
76 1997; Huang et al., 1990). While other basigin group members have been detected to display  
77 a multifunctional nature, the biological role of embigin is not understood yet. For example,  
78 basigin has been reported to act in a wide variety of cellular processes including  
79 development, activation, proliferation, migration, invasion, and adhesion in T lymphocytes

80 (Hahn et al., 2015). Also neuropilin, which is enriched in neurons and synapses, has  
81 basigin-like functions but in more restricted locations (Beesley et al., 2014; Hill et al.,  
82 1988; Langnaese et al., 1997; Smalla et al., 2000). Given the variety of cellular functions that  
83 the basigin family members are involved in, it is not surprising that they also have  
84 connections to pathological processes, such as cancer (Nabeshima et al., 2006; Riethdorf et  
85 al., 2006). To date, embigin has been reported to be a suppressor of tumorigenesis in breast  
86 cancer (Chao et al., 2015) and a promoter of epithelial-mesenchymal transition in pancreatic  
87 carcinoma (Jung et al., 2016).

88 All three members of the basigin group are involved in cellular metabolism (Kirk et al., 2000).  
89 They have been reported to escort monocarboxylate transporters (MCTs), the carriers of  
90 molecules such as L-lactate and pyruvate, to the plasma membrane (Fisel et al., 2018).  
91 Embigin is identified as a primary ancillary protein for MCT2 (Wilson et al., 2005), but it might  
92 act as the assisting protein also for MCTs 1, 3 and 4 (Halestrap, 2013; Skiba et al., 2021). A  
93 recent paper has shed more light on the complex mechanism of the MCT function and  
94 unveiled a direct interaction between basigin or embigin and carbonic anhydrase IV (CA IV)  
95 (Forero-Quintero et al., 2019). CA IV is a metalloenzyme that also facilitates the transport  
96 activities of specific MCTs (Becker et al., 2005; Becker et al., 2010; Klier et al., 2011). Besides  
97 the potential role of embigin in the MCT and CA IV translocation, only a few embigin  
98 interaction partners have been reported. It has been suggested that embigin may regulate  
99 cell adhesion by modifying the integrin function (Huang et al., 1993). Embigin has also been  
100 reported to interact with galectin-3 (Dange et al., 2017) and S100A4 protein (Ruma et al.,  
101 2018). Furthermore, embigin has been identified as a bone marrow stem cell niche factor,  
102 more specifically as a hematopoietic stem/progenitor cell quiescence regulator (Silberstein  
103 et al., 2016). During the maturation of bone marrow progenitor cells, embigin seems to be  
104 specifically repressed by a transcription factor Pax5 in B lymphocytes (Pridans et al., 2008).  
105 In addition to the putative participation in these processes, the physiological role of embigin  
106 is still poorly understood.

107 Here, we unveil the expression pattern of embigin protein during mice embryonic  
108 development and in adult mice. Besides, we shed light on the biological function of embigin  
109 during development. Our embigin knockout mouse model and RNA sequencing of  
110 embryonic lungs confirm that embigin is a critical protein for overall embryonic growth,  
111 particularly for early lung development.

## 112 **Results**

### 113 **Embigin is expressed from early mouse embryonic development into adulthood**

114 The knowledge of embigin expression in mouse tissues is dispersed and partly incoherent.  
115 Therefore, we used the whole-mount immunofluorescence technique to visualize the  
116 embigin protein expression pattern in mice embryos at embryonic days E8.5 - E10.5. In  
117 agreement with previous studies (Fan et al., 1998;Huang et al., 1990), the most robust  
118 embigin expression was detected at the early stage of embryogenesis, and embigin was  
119 observed to be an abundant protein specifically in the developing gut (Fig. 1A). However,  
120 embigin expression did not cease after E10.5, albeit an apparent decrease in its expression  
121 was observed. At E13.5, low embigin expression was detected in restricted tissues such as  
122 kidney, lung, and small intestine (Fig. S1A), and later in gestation, at E17.5, increased  
123 embigin expression was observed in the kidneys (Fig. 1B). Thus, unlike stated in the  
124 previous reports, embigin expression is not restricted to the early embryonic development  
125 of the mouse but continues throughout gestation.

126 We also determined the precise location of embigin after the gestational period. A set of  
127 adult organs at the age of four months was analyzed using immunofluorescence  
128 microscopy. Kidney (Fig. 1B), lung (Fig. 1C), epididymis, and skin (Fig. 1D) showed high  
129 embigin levels. In the kidneys, embigin was located in the epithelial cells lining tubular  
130 structures (Fig. 1B), and also the epithelial cells of the lung airways were shown to be highly  
131 embigin positive (Fig. 1C). Furthermore, the tubular structures in the caudal pole of the  
132 epididymis were determined to have a strong embigin expression, whereas, in the skin,  
133 embigin expression was located in the sebaceous glands (Fig. 1D). In both lungs and  
134 kidneys, the expression level of embigin was shown to elevate shortly after birth at P3, and  
135 the expression was observed to be the strongest in the adult mice (Figs 1B, C). No  
136 differences between male and female mice were observed, apart from the embigin  
137 expression in the male epididymis.

138 The embigin protein expression in the organs described above was also further confirmed  
139 by Western blot (Fig. 1E). A strong signal was also detected in the testis suggesting the  
140 presence of embigin in the tissue. Heart, liver, spleen, small intestine, adrenal glands, and  
141 ovary were determined as embigin negative tissues (Fig. S1B). In the embigin positive  
142 tissues, embigin was detected as a characteristic broad protein band ranging from about 60

143 to 90 kDa. The observed variation of the approximated molecular mass is typical for embigin  
144 and can be explained by the differential glycosylation of the nine potential glycosylation sites  
145 in the protein (Ozawa et al., 1988). The highest molecular mass of embigin was observed  
146 in the kidney, while the lowest molecular mass was found in the epididymis, and the smallest  
147 variation was detected in the skin (Fig. 1E). Thus, the degree of embigin glycosylation was  
148 shown to vary in a tissue-dependent manner, which might implicate the distinct function of  
149 embigin in these tissues. Together, our results confirm that the embigin protein is expressed  
150 in the specific structures of the lung, kidney, skin, epididymis, and testis of the four-month-  
151 old mice.

### 152 **Embigin deficiency leads to an increase in neonatal mortality**

153 To examine the role of embigin *in vivo*, knockout mice lacking the exon 5 of the embigin  
154 gene were generated (Fig. S2A). The absence of embigin expression in the embigin  
155 deficient ( $Emb^{-/-}$ ) mice was confirmed both by PCR (Fig. S2B) and by performing Western  
156 blot analysis of the kidney tissues (Fig. S2C). In the Western blot analysis, a typical diffuse  
157 band around 75 kDa was observed only in the kidneys of the wild type (WT) mice (Fig. S2C).  
158 Furthermore, final verification of the lack of embigin in  $Emb^{-/-}$  mice was gained through  
159 staining  $Emb^{-/-}$  and WT E9.5 embryos with embigin and alpha smooth-muscle actin ( $\alpha$ -SMA)  
160 antibodies (Fig. S2D).

161 Using  $Emb^{-/-}$  mice, the effect of the embigin deficiency on the lifespan of affected animals  
162 was studied next. The genotypes of 203 embryos from  $Emb^{+/-}$  heterozygous intercrosses at  
163 the ages between E8.5 and E17.5 were analyzed. At embryonic day E8.5, 25% of all  
164 embryos were embigin deficient. Thus, the relative frequency of the genotypes at this  
165 embryonic stage was found to follow the Mendelian distribution. When embryos at E17.5  
166 were inspected, the frequency of  $Emb^{-/-}$  embryos was found to be only 18% instead of the  
167 expected 25% (Fig. 2A). Spearman's rank correlation analysis indicated that the small  
168 gradual decrease in the number of embigin null embryos as the gestation progressed was  
169 statistically significant ( $r_s = -0.837$ ,  $p = 0.019$ ; Fig. 2A). The frequency of  $Emb^{+/-}$  embryos  
170 was also decreasing, but not in a statistically significant magnitude ( $r_s = -0.667$ ,  $p = 0.102$ ;  
171 Fig. 2A). Next, the genotypes of 284 pups from 40 different litters were examined between  
172 P14 and P21. Based on the study, only 7% of the pups from  $Emb^{+/-}$  breedings were embigin  
173 deficient at P14-P21 (Fig. 2B). 42% survived  $Emb^{-/-}$  pups were males and 58% females. Our  
174 results indicate that based on the Mendelian expectation, 28% of  $Emb^{-/-}$  pups were lost

175 already in the prenatal period, and in total, 72% of expected  $Emb^{-/-}$  pups did not reach  
176 adulthood.

177 To determine the time point at which the lethality of  $Emb^{-/-}$  mice occurred, 100 pups from 17  
178 litters from six different  $Emb^{+/-}$  breedings were followed up after birth. These pups were  
179 genotyped after their death. The results indicate that most of the  $Emb^{-/-}$  pups died during  
180 days 0 and 1 in postnatal life (Fig. 2C). Noteworthy, the mortality of  $Emb^{+/-}$  mice also  
181 appeared to be slightly elevated. While 81% of the born  $Emb^{-/-}$  mice died during the first  
182 three postnatal days, 26% of  $Emb^{+/-}$  and only 9% of WT mice were lost during the period.  
183 Furthermore, 16% of the pups were fully cannibalized during postnatal days of P1-P3 before  
184 they were genotyped. While the frequency of  $Emb^{-/-}$  embryos slightly decreased already  
185 before birth, the results indicate that the major loss of  $Emb^{-/-}$  mice occurred during the  
186 neonatal period. It cannot be excluded, however, that some pups were lost already during  
187 the parturition.

#### 188 **Embigin deficiency does not affect the lifespan of the mice after the neonatal period**

189 To study the effect of embigin deficiency on mice that survived beyond the first three  
190 postnatal days,  $Emb^{-/-}$  and WT mice were further analyzed at the age of 2, 4, or 6 months.  
191 The obtained results indicated that there was no difference in body weights when the adult  
192 WT and  $Emb^{-/-}$  mice were compared (Fig. S3A). Furthermore, neither the histology nor  
193 weights of specific organs were different (Figs S3B, C, D; Table S1). To assess whether  
194 embigin deficiency could affect the fertility of mice, ten pairs of  $Emb^{-/-}$  mice were allowed to  
195 breed. Four out of ten breedings did not produce viable pups and out of the 23 litters  
196 produced, ten were fully cannibalized. On average 2.3 pups per litter survived and reached  
197 adulthood (Table 1). These observations were consistent with the high mortality rate of  
198 embigin deficient embryos and newly born mice. Based on the data, the embigin deficient  
199 mice that survive are fertile, and they have changes neither in the typical body and organ  
200 weights nor the histological architecture of the tissues studied.

#### 201 **Embigin deficiency causes delayed growth of mouse embryos**

202 While the weights of four-month-old  $Emb^{-/-}$  mice did not differ from WT mice, the body sizes  
203 of  $Emb^{-/-}$  embryos tend to be smaller than their  $Emb^{+/-}$  or WT littermates as imaged at E11.5,  
204 E14.5, and E17.5 in Fig. 3A. Furthermore, the body weights of the  $Emb^{-/-}$  embryos at E17.5  
205 were significantly ( $p = 0.001$ ) smaller than their littermates, average body weights being 690

206  $\pm 54$  mg for  $Emb^{-/-}$  mice and,  $916 \pm 136$  mg for  $Emb^{+/-}$  and  $834 \pm 134$  mg for WT embryos  
207 (Fig. 3B). The fact that the normal function of the placenta is pivotal for optimal fetal growth  
208 and development led us to characterize the placentas of  $Emb^{-/-}$  and WT embryos from  $Emb^{+/-}$   
209 breedings. Between E11.5 and E17.5, an increasing embigin expression was detected in  
210 the labyrinthine layer of the placenta in WT embryos, but not in  $Emb^{-/-}$  embryos, by using  
211 immunofluorescence staining technique (Fig. 3C). Though the intensive embigin expression  
212 was detected in the placenta, histological differences were not observed between the  
213 placentas of WT and  $Emb^{-/-}$  embryos (Fig. 3D). Furthermore, based on the RNA sequencing  
214 data, only four genes, one of them being embigin, were differentially expressed in the  
215 placentas of five  $Emb^{-/-}$  embryos compared to the placentas of five WT embryos at E17.5  
216 (Fig. 3E). The gene was determined to be differentially expressed only if log<sub>2</sub> of fold change  
217 value was above 0.6 or below -0.6 and Benjamini-Hochberg-corrected p-value less than  
218 0.05. Taken together, these results do not support the idea that embigin deficiency could  
219 cause placental dysfunction that would manifest as a fetal growth restriction observed in  
220  $Emb^{-/-}$  mice. Therefore, other vital organs were examined next.

## 221 **The maturation of lungs is delayed in embigin deficient embryos**

222 The histological examination of the  $Emb^{-/-}$  lungs at E17.5 unveiled the abnormal structure  
223 (Fig. 4A): the number and the size of the airways were observed to be significantly smaller  
224 ( $p = 0.00002$ ) when compared to the architecture of the lungs of their WT littermates (Fig.  
225 4B). Further, the relative area of airways of the  $Emb^{-/-}$  embryonic lungs at E17.5 was  
226 determined to correlate with the size of the  $Emb^{-/-}$  embryo strongly ( $r_s = 0.701$ ,  $p = 0.005$ ,  
227 Fig. 4C): the bigger the embryo the more mature were the lungs. However, in  $Emb^{-/-}$   
228 embryos, the lung development was defined to be systematically delayed at the canalicular  
229 stage at E17.5. This developmental stage is characteristic of the normal mouse lung  
230 maturation at E16.5, but it should not be prominent at E17.5.

231 Next, the activity of alkaline phosphatase was analyzed in the amniotic fluid at E17.5.  
232 Elevated alkaline phosphatase activity at the end of gestation has been shown to indicate  
233 increasing fetal lung maturity (Brocklehurst and Wilde, 1980). When the alkaline  
234 phosphatase activity of amniotic fluids from WT,  $Emb^{+/-}$  and  $Emb^{-/-}$  embryos were measured,  
235 the average activity was 35.8 U/l for WT, 32 U/l for  $Emb^{+/-}$  and 26 U/l for  $Emb^{-/-}$  embryos.  
236 Thus, the alkaline phosphatase activity in the amniotic fluid of the  $Emb^{-/-}$  embryos was  
237 significantly lower than the activity detected in WT embryos ( $p = 0.024$ ). The average



238 alkaline phosphatase activity in the amniotic fluid of  $Emb^{+/-}$  embryos neither reached the  
239 same level as detected in WT embryos, but the difference was not statistically significant ( $p$   
240 = 0.45; Fig. 4D). Not only the activity of the alkaline phosphatase, but also sodium, calcium,  
241 and glucose concentrations have been reported to vary in the amniotic fluid during normal  
242 pregnancy: their concentrations increase and subsequently decrease as the gestation  
243 progresses (Cheung and Brace, 2005). While the alkaline phosphatase activity was  
244 significantly lower in the amniotic fluid from  $Emb^{-/-}$  embryos at E17.5, the concentrations of  
245 sodium, calcium, or glucose did not significantly differ between WT,  $Emb^{+/-}$ , and  $Emb^{-/-}$   
246 embryos (Fig. S5). Only moderate changes observed in the concentrations of these factors  
247 indicate that the pregnancies of  $Emb^{-/-}$  embryos progress normally. Both the abnormal  
248 histological architecture of the fetal lungs and the lower activity of alkaline phosphatase in  
249 the amniotic fluids strongly suggest that the maturation of the lungs is delayed in  $Emb^{-/-}$   
250 embryos.

251 To further study the developmental delay, transcriptomes of embryonic lungs at E17.5 were  
252 analyzed by RNA sequencing. While the gene expression profiles of the placentas of  $Emb^{-/-}$   
253 and WT mice resembled each other (Figs 5A, 3E), in the lungs total 161 genes were  
254 differentially expressed at E17.5 between the genotypes (Figs 5A, S4). Particularly genes  
255 that participate in cell division were upregulated in the lungs of  $Emb^{-/-}$  embryos when  
256 compared to WT mice (Fig. 5B), including cell cycle effectors *Ccnf*, *Cdc6*, *Cdc45*, *Cdt1*, and  
257 *Gli1*. Downregulated genes consisted mainly of genes involved in the immune response  
258 (Fig. 5B). Additionally, many of these genes are potential transcription factors and growth  
259 factors in lung development. For example, *Scgb3a2* is a growth factor in lung promoting both  
260 early and late stages of fetal lung development (Kurotani et al., 2008), *Adams18* is pivotal  
261 in airway branching morphogenesis (Lu et al., 2020), and *Hmga2* is required for WNT  
262 signaling during lung development (Singh et al., 2014). The data suggest that the lack of  
263 embigin causes delays rather than structural defects in lung development. In  $Emb^{-/-}$   
264 embryos, the increased expression of cell proliferation-related genes at E17.5 may indicate,  
265 that the lungs execute an earlier stage of differentiation compared to WTs. The crucial  
266 function of embigin especially during the earlier stages of development is supported by the  
267 wave-like changes in its expression profile: the protein is prominent in the early days of  
268 development (Fig. 1A), only weakly expressed in embryonic lungs at E13.5 (Fig. S1A) and  
269 below detection level in lungs at E17.5. At mRNA level, embigin is clearly present in lungs  
270 at E17.5 (Fig. S4), and embigin protein expression rises again after birth (Fig. 1C).

271 Furthermore, the lifespan or the histological architecture of lungs are not affected in *Emb<sup>-/-</sup>*  
272 mice that survive to adulthood (Fig. S3). Thus, the results indicate that embigin deficiency  
273 directly affects lung development, which explains well the detected high perinatal mortality  
274 of *Emb<sup>-/-</sup>* mice.

275 In conclusion, our study provides the first characterization of embigin knockout mice. We  
276 demonstrate that embigin is normally expressed in the adult mouse lung, kidney, skin,  
277 epididymis, and testis. Furthermore, the study emphasizes the role of embigin during mouse  
278 embryonic development: embigin deficiency leads not only to growth retardation of the *Emb<sup>-/-</sup>*  
279 embryo but also to high, 72%, mainly neonatal mortality. Though embigin is expressed in  
280 the placenta, no such signs of placental dysfunction were detected that could explain the  
281 delay in embryonic growth of the *Emb<sup>-/-</sup>* mice. Instead, the data suggest that the increased  
282 lethality of *Emb<sup>-/-</sup>* mice was primarily due to developmental delays, rather than structural  
283 defects, in embryonic lungs.

## 284 Discussion

285 Embigin has remained a less studied member of the basigin subgroup in the immunoglobulin  
286 superfamily. Here, we describe embigin expression and its role in mouse development using  
287 embigin deficient mice. Our data reveal that embigin is a widely expressed protein during  
288 entire mouse embryonic development. In adult mice, embigin expression is restricted mainly  
289 to epithelial cells lining tubular structures in the lung, kidney, and epididymis, in addition to  
290 skin and testis. Given that 72% of *Emb<sup>-/-</sup>* offsprings are lost latest in the neonatal period and  
291 the *Emb<sup>-/-</sup>* deficient fetuses are typically smaller with a delay in lung maturation, embigin can  
292 be considered as a pivotal protein for mouse development.

293 Our findings indicate that embigin is an abundantly expressed protein in the developing  
294 mouse embryo during the first half of gestation. This observation is in agreement with the  
295 previous data gained from the analyses performed at mRNA level: embigin mRNA has been  
296 described to be moderately expressed at mouse embryonic days E5 - E6 and strongly  
297 present at E7 - E9. However, the embigin expression was reported to disappear after E9,  
298 and only a weak expression of embigin mRNA was observed in adult animals (Fan et al.,  
299 1998;Huang et al., 1990). In line with the mRNA studies, we observed a decrease in the  
300 embigin protein level after E10.5, yet we could detect embigin protein throughout the  
301 embryonic period. In adult mice, we observed the embigin expression to be restricted to  
302 specific organs, i.e., the epithelial cells of the lung and kidney, sebaceous glands in the skin,  
303 as well as in epididymis and testis. Tabula Muris, a compendium of single-cell transcriptome  
304 data from the 3-month-old mice, supports our findings showing that embigin is present, for  
305 instance, in the epithelial cells of lungs and in the epithelial cells of collecting duct in the  
306 kidney (The Tabula Muris Consortium, 2018). In addition to the restricted expression pattern  
307 of the embigin in adult mice, we observed it to be differentially glycosylated in each tissue.  
308 As in the case of basigin, this might propose the tissue-specific function of the protein (Bai  
309 et al., 2014;Tang et al., 2004).

310 Embigin deficiency compromised the viability of *Emb<sup>-/-</sup>* offspring. Despite we observed the  
311 high embigin expression during the first embryonic days, embigin deficiency did not increase  
312 the mortality of *Emb<sup>-/-</sup>* mice on this particular phase of gestation. Instead, the fetal resorption  
313 among *Emb<sup>-/-</sup>* embryos started to increase slightly after embryonic day E8.5. However, the  
314 highest occurrence of loss of *Emb<sup>-/-</sup>* offspring was in the neonatal period. When compared  
315 to the phenotype of basigin null animals (*Bsg<sup>-/-</sup>*), the presence of embigin seems to be less

316 critical than basigin during embryonic development: the majority, about 70%, of Bsg<sup>-/-</sup>  
317 embryos die during the early stages of embryonic development. Consequently, basigin has  
318 been suggested to be involved in intercellular recognition during implantation and/or early  
319 post-implantation stages (Igakura et al., 1998). In addition to the higher survival rate during  
320 the embryonic period, Emb<sup>-/-</sup> mice also survived better (28%) than Bsg<sup>-/-</sup> mice (14%) after  
321 birth. Furthermore, while half of the survived Bsg<sup>-/-</sup> mice have been observed to die in  
322 interstitial pneumonia during the first month after birth (Igakura et al., 1998), the Emb<sup>-/-</sup> mice,  
323 that successfully passed the early neonatal period, seemed to have an unaffected lifespan.  
324 For an unknown reason, the survival of Emb<sup>-/-</sup> females was slightly better than males. We  
325 also show that embigin null animals were able to produce offspring, while Bsg<sup>-/-</sup> males have  
326 been reported to be sterile, and also Bsg<sup>-/-</sup> females have been detected with fertility problems  
327 (Igakura et al., 1998; Kuno et al., 1998). The observed phenotype of Emb<sup>-/-</sup> mice is also very  
328 different when compared to neuroplastin deficient animals. For example, Np65 null mice  
329 have been reported to show deviant behavior in cognitive tests (Amuti et al., 2016), and they  
330 suffer from the loss of hearing (Carrott et al., 2016). Thus, it can be summarized that all  
331 three members of the basigin family have separate functions.

332 The mortality among embigin null embryos started to rise after day E8.5. During the  
333 pregnancy, the Emb<sup>-/-</sup> embryos were also significantly smaller than their WT littermates.  
334 Since the placenta is pivotal for normal fetal growth and development, the dysfunction of the  
335 placenta might explain the delay in embryonic growth and development. Indeed, we  
336 detected fetal-derived embigin to be an abundant protein in the labyrinthine layer of the  
337 placenta, and its expression seemed to increase toward the later stages of gestation.  
338 However, only minor changes were observed when the gene expression patterns of the  
339 placentas of Emb<sup>-/-</sup> and WT mice were compared,. Neither the placental architecture was  
340 affected in Emb<sup>-/-</sup> embryos. The data suggest that placental dysfunction may not be the  
341 primary cause for the growth delay of Emb<sup>-/-</sup> embryos during the second half of gestation.

342 Because we did observe neither typical dysmorphological features in the placenta of Emb<sup>-/-</sup>  
343 fetuses nor correlation with typical fetal organ defects caused by the impaired placenta  
344 (Perez-Garcia et al., 2018), the primary reason for the loss of Emb<sup>-/-</sup> offspring might reside  
345 in the embryo itself. We did not detect any apparent defects in other major tissues of Emb<sup>-/-</sup>  
346 embryos, however, the significantly delayed morphogenesis in the fetal lungs was  
347 characterized. Histologically, lung development and maturation has been divided into four  
348 stages: pseudoglandular, canalicular, terminal saccular, and alveolar (Warburton et al.,

349 2010). The  $Emb^{-/-}$  lung development at E17.5 was observed to be delayed at the canalicular  
350 stage which is characteristic of the normal mouse lung maturation at E16.5. As expected,  
351 the WT lung showed typical lung morphology for the terminal saccular stage at E17.5. Since  
352 the elevated level of alkaline phosphatase activity in the amniotic fluid at the end of gestation  
353 has been shown to correlate with fetal lung maturity (Brocklehurst and Wilde, 1980), the low  
354 alkaline phosphatase activity detected in the amniotic fluid of  $Emb^{-/-}$  further confirmed the  
355 delay in the lung development of the  $Emb^{-/-}$  embryos. Maturity-related increase in alkaline  
356 phosphatase activity has also been reported in the epithelial cells that line the airway cavities  
357 in the embryonic murine lungs (Sasaki and Kahn, 2014). Based on the function of alkaline  
358 phosphatase, glucocorticoids, which increase the activity of alkaline phosphatase in some  
359 conditions, have been used for decades to induce the maturation of the preterm fetal lungs  
360 (Green et al., 1990; Grier and Halliday, 2004). On this basis, the lungs of the  $Emb^{-/-}$  mice  
361 were suggested to be underdeveloped at the stage of birth, which explains the remarkably  
362 increased neonatal mortality of the affected animals.

363 Lung development is controlled by various transcription factors and growth factors, and  
364 some of the upregulated or downregulated genes we observed in E17.5  $Emb^{-/-}$  mice can be  
365 directly linked to lung development. We also discovered that several genes involved in cell  
366 proliferation were upregulated in  $Emb^{-/-}$  mice implicating the earlier stage of lung  
367 development compared to WT mice. During the canalicular stage, a massive increase in the  
368 cell mass occurs during the formation of the most distal airways (Warburton et al., 2010)  
369 airways. Overall, we suggest that *embigin* causes primarily a developmental delay in lung  
370 maturation rather than structural defects. Noteworthy, at the same developmental stage, E9,  
371 where we observed the first losses of  $Emb^{-/-}$  embryos, the organogenesis of lungs begins  
372 (Warburton et al., 2010). *Embigin* expression was detected to be highest at the early  
373 developmental days, gradually disappearing from the embryonic lungs only to be increased  
374 again after birth. Given that *embigin* deficient mice that survive do not display changes in  
375 their lifespan or in the histological lung architecture, the critical function of *embigin* can be  
376 placed on the early days of development.

377 In summary, our results indicate that *embigin* is a critical protein for the proper  
378 morphogenesis of the mouse lungs during development. Delayed maturation of embryonic  
379 lungs explains why the majority of  $Emb^{-/-}$  mice are lost during the neonatal period. However,  
380 given the abundant expression of *embigin* and the nature of other *basigin* family members  
381 as multifunctional proteins, it is possible that  $Emb^{-/-}$  mice have several defects that

382 simultaneously contribute to the  $Emb^{-/-}$  knockout phenotype. To conclude, our results  
383 indicate that abundantly expressed embigin is a vital protein for overall embryonic  
384 development and for lung maturation that explains the high mortality of  $Emb^{-/-}$  embryos.

## 385 **Materials and methods**

386

### 387 **REAGENTS**

388 **Cell lines** – G4 embryonic stem cells derived from 129S6/SvEvTac x C57BL/6NCrl mice  
389 (Mutant Mouse Resource & Research Center (MMRRC)) were cultured on neomycin-  
390 resistant primary embryonic fibroblast (Neo-resistant MEF feeder cells, Applied StemCell)  
391 feeder layer in KnockOut DMEM medium (Gibco, Thermo Fisher Scientific) supplemented  
392 with 10% ES screened fetal bovine serum, heat-inactivated (Cytiva). The cell lines were  
393 cultured at 37°C in a humidified atmosphere with 5% CO<sub>2</sub>.

394 **Antibodies** – Following antibodies were used in our studies: Embigin Monoclonal Antibody,  
395 clone G7.43.1, 14-5839-81, Lot#4343173, eBioscience, Thermo Fisher Scientific (Western  
396 blotting 1:1000, whole-mount and immunofluorescence 1:200); Monoclonal Anti-β-Tubulin I  
397 antibody produced in mouse, clone SAP.4G, T7816, Lot#068M4850V, Sigma-Aldrich  
398 (Western blotting 1:20 000); Anti-α smooth muscle Actin (α-SMA) antibody [1A4] (Alexa  
399 Fluor 488), ab184675, Lot#GR316286-7, Abcam (whole-mount: 1:250); Collagen I  
400 Antibody, NB600-408, Lot#41476, Novus Biologicals (immunofluorescence 1:300); IRDye  
401 secondary antibodies, LI-COR Biosciences (Western blotting 1:15 000); and Alexa Fluor  
402 secondary antibodies, Thermo Fisher Scientific (whole-mount and immunofluorescence  
403 1:400).

404

### 405 **ANIMAL MODELS**

406 C57BL/N6 mice (*Mus musculus*, Charles River Laboratories, Willmington, MA) and the  
407 generated embigin knockout mice (collaboration with Turku Center for Disease Modeling)  
408 were maintained in Central Animal Laboratory at the University of Turku, Finland. All animal  
409 experiments were formally reviewed and approved by the Ethical Committee for Animal  
410 Experimentation in Finland, complying with international guidelines on the care and use of  
411 laboratory animals. The mouse embryos were examined between embryonic days E8.5-  
412 E17.5 and pups at postnatal days P0-P3. Both male and female adult mice were studied at  
413 the age of 2, 4, or 6 months.

414

## 415 **METHOD DETAILS**

416 **RNA sequencing** – Five E17.5 WT and *Emb<sup>-/-</sup>* placentas and lungs were dissected, and the  
417 RNA was isolated as described. The libraries were prepared from 300 ng of RNA from each  
418 sample using TruSeq Stranded mRNA HT Kit and TruSeq Stranded mRNA Sample  
419 Preparation protocol 15031047 (Illumina). Sequencing was performed with NovaSeq 6000  
420 SP Sequencing System (Illumina) using paired-end sequencing chemistry and 2 x 50 bp  
421 read length. The reads obtained from the instrument were base called using bcl2fastq2  
422 conversion software. Raw data were obtained as fastq-files, which were uploaded to  
423 Chipster (Kallio et al., 2011). The reads were aligned against the reference genome (*Mus*  
424 *musculus* GRCm38.95, available in Chipster) using STAR, version 2.7.3 (Dobin et al., 2013).  
425 The reads associated with each gene were counted using the HTSeq package, version  
426 0.12.4 (Anders et al., 2015).

427 The edgeR R/Bioconductor package (Robinson et al., 2010) was used to normalize gene-  
428 wise read counts by TMM normalization method and to perform statistical tests between  
429 groups. The results were filtered to have a minimum of 50 reads per gene in at least one  
430 sample. The gene was determined as differentially expressed if the following conditions  
431 were met: log2 of fold change value was above 0.6 or below -0.6 and Benjamini-Hochberg-  
432 corrected p-value less than 0.05. WebGestalt, <http://www.webgestalt.org/> (Liao, Y. et al.,  
433 2019), was used to perform over-representation analysis of differentially expressed genes  
434 against biological process gene ontology. Morpheus  
435 (<https://software.broadinstitute.org/morpheus>) was used to generate heatmaps of the  
436 differentially expressed genes. For generating heatmaps by Morpheus  
437 (<https://software.broadinstitute.org/morpheus>), the raw counts were first transformed by  
438 using `deseq-transform` function of DEseq2 package (Love et al., 2014).

439 **Generation of embigin deficient (*Emb<sup>-/-</sup>*) mice** – *Emb<sup>-/-</sup>* mice were generated in  
440 collaboration with Turku Center for Disease Modeling. First, a targeting vector for *Emb* gene,  
441 HTGR06008\_A\_1\_E08 from The European Conditional Mouse Mutagenesis Program, was  
442 linearized with *Asi*SI restriction enzyme (R0630S, NEB). Construct was then transfected by  
443 electroporation into G4 embryonic stem cells derived from 129S6/SvEvTac x C57BL/6NCrl  
444 mice and cultured on neomycin-resistant primary embryonic fibroblast feeder layer for 7-9



445 days. To ensure the occurrence of the correct homologous recombination, positive ES cell  
446 clones were screened by PCR and sequencing. ES cells were injected into C57BL/N6  
447 mouse blastocysts to generate chimeric mice. Germline transmission was achieved by  
448 cross-breeding male chimeras with C57BL/N6 females.

449 **Timed matings and genotype determination** – In timed matings, the day of vaginal plug  
450 appearance was considered as embryonic day 0.5 (E0.5). To analyze the survival of the  
451  $Emb^{-/-}$  embryos, the genotypes from 203 pups from 25 litters and 25  $Emb^{+/-}$  breedings were  
452 determined between embryonic days E8.5-E17.5. Furthermore, the genotypes of 100 pups  
453 from 17 litters from six different  $Emb^{+/-}$  breedings were analyzed between postnatal days  
454 P0-P3; and the genotypes from 284 pups from 40 different litters from  $Emb^{+/-}$  breedings were  
455 analyzed at P14-P21. Genomic DNA was extracted with gDNA NucleSpin tissue kit  
456 (Macherey-Nagel) and the genotypes of the mice were determined from genomic DNA by  
457 using a PCR primer pair 1 (5'-TAAGTCTCTTGTGGCTGTG-3'; 5'-  
458 CACAACGGGTTCTTCTGTTAGTCC-3') to detect embigin knockout allele and a PCR  
459 primer pair 2 (5'-ACCCTTAAGTGCATGAACAAAA-3'; 5'-  
460 GGGTTCCTTGGCATTGTTACTAA-3') to detect embigin WT allele. DreamTaq polymerase  
461 (Thermo Fisher Scientific) was used according to the manufacturer's instructions using  
462 following reaction settings: 95 °C, 2 min; 35 x [95 °C, 30 s; 50 °C, 30 s; 72 °C, 1 min]; 72 °C,  
463 10 min.

464  **$Emb^{-/-}$  mice fertility** – The fertility of  $Emb^{-/-}$  mice was studied with ten  $Emb^{-/-}$  breedings. The  
465 crossings were followed until the pups were genotyped at the age of P14-P21. Viable pups  
466 and average litter size were examined.

467 **Size of embryos at E17.5** – The body weights of the embryos from  $Emb^{+/-}$  breedings were  
468 weighted at E17.5. Six litters with 53 pups were analyzed in total.

469 **Histological staining** – Male and female WT and  $Emb^{-/-}$  were examined at the age of 2, 4,  
470 and 6 months. Three to four mice were included in each independent study group. The mice  
471 and the specific organs, heart, lung, liver, spleen, kidney, epididymis, testis, and ovary, were  
472 weighted, and in addition to the samples of skin, small intestine and adrenal glands were  
473 prepared for histological analysis. Lungs were additionally analyzed from 11 WT and 14  
474  $Emb^{-/-}$  mice from six E17.5  $Emb^{+/-}$  breedings. Placentas were analyzed at E17.5. Formalin-  
475 fixed samples were fixed in paraffin and 4  $\mu$ m sections were cut using an RM2255 microtome

476 (Leica) and immobilized to adhesion slides (SuperFrost Plus, Thermo Fisher Scientific)  
477 overnight at 37 °C. The sections were deparaffinized, rehydrated, and stained with  
478 conventional hematoxylin and eosin (HE), imaged with Panoramic 250 Flash III slide  
479 scanner (3D Histech), and analyzed with CaseViewer program (3D Histech). In the case of  
480 HE-stained histological lung section from E17.5 embryos, three images per organ section at  
481 20x magnification were selected with the CaseViewer program. The relative area of airways  
482 in the lung section images was analyzed with ImageJ/Fiji (Schindelin et al., 2012).

483 **Western blotting** – The expression of embigin in the lung, kidney, skin, heart, liver, spleen,  
484 small intestine, adrenal gland, epididymis, testis, and ovary, of WT mice and the kidneys of  
485 Emb<sup>-/-</sup> mice at the age of four months was analyzed with Western blotting. Protein samples  
486 were extracted from the organs with the NucleoSpin RNA/Protein kit (Macherey-Nagel).  
487 Macherey-Nagel Bead Tubes Type F was used in tissue homogenization. Protein  
488 concentrations were measured with Pierce 660nm Protein Assay (Thermo Scientific), and  
489 10 µg of protein were loaded on 4–20% FastGene SDS-PAGE gradient gels (Nippon  
490 Genetics). Embigin and β-tubulin (diluted in 5% milk and 0.1% Tween-20 in TBS) were  
491 stained in the membrane for 2 hours at RT. IRDye secondary antibodies and Odyssey CLx  
492 imager (LI-COR Biosciences) were used for signal detection.

493 **Whole-mount fluorescent immunohistochemistry** – The embryonic embigin expression  
494 was analyzed using a whole-mount immunostaining technique as described previously  
495 (Yokomizo et al., 2012). However, PBS-MT solution was replaced with PBS-BSA-T (1%  
496 (w/v) bovine serum albumin (BSA) and 0.4% (v/v) Triton X-100 in PBS). 1% (v/v) normal  
497 mouse serum (10410, Invitrogen) and 0.5% (v/v) fetal calf serum solution (PromoCell) in  
498 PBS-BSA-T was used as blocking solution. WT embryos at E8.5, E9.5, and E10.5 and Emb<sup>-/-</sup>  
499 embryos at E9.5 were stained with embigin and α-SMA antibodies. In the negative control  
500 for embigin, a secondary antibody only was applied. α-SMA was used as a positive control.  
501 The embryos were imaged with LSM 880 confocal microscope (Zeiss) using Plan-  
502 Aplanachromat 20x/0.8 M27 objective for E8.5 embryos and Plan-Aplanachromat 10x/0.3 M27 for  
503 E9.5 and E10.5 embryos. Image stacking, background subtractions, linear brightness, and  
504 contrast adjustments were performed with Zeiss ZEN blue software and Imaris (Bitplane).

505 **Immunofluorescence** – Embigin expression was analyzed in the paraffin sections of the  
506 whole embryo at E13.5 in addition to the paraffin sections of lung and kidney at E17.5 and  
507 postnatal day 3 (P3). Placental paraffin sections were examined at E11.5 and E17.5. The

508 expression was further examined in the paraffin sections of the lung, kidney, skin, heart,  
509 liver, spleen, small intestine, adrenal gland, epididymis, testis, and ovary from three four-  
510 month-old male and female. 4  $\mu\text{m}$  sections were cut and immobilized to adhesion slides as  
511 mentioned earlier. The sections were deparaffinized and rehydrated. The antigen retrieval  
512 was achieved with 3 min proteinase K treatment (S3020, Agilent), and the sections were  
513 washed in PBS. The samples were blocked with 1% (v/v) BSA in PBS for 1 h at RT, and  
514 stained with antibodies against embigin and collagen I in blocking buffer o/n at 4 °C. The  
515 samples were washed with PBS and incubated with Alexa Fluor secondary antibodies in  
516 blocking buffer for 1 h at RT. The sections were washed with PBS and nuclei were labeled  
517 with Hoechst 33342 (1:5000 in PBS, Thermo Fisher Scientific) for 10 min at RT. The sections  
518 were rinsed in PBS and finally in dH<sub>2</sub>O and mounted in Mowiol (Calbiochem) containing 25  
519 mg/ml DABCO anti-fading reagent (Sigma). The samples were imaged with LSM 880  
520 confocal microscope (Zeiss) using a Plan-Apochromat 20x/0.8 M27 objective. Image  
521 stacking, background subtractions, linear brightness, and contrast adjustments were  
522 performed with ImageJ/Fiji software.

523 **Alkaline phosphatase in amniotic fluid** – Amniotic fluids were collected from six WT, five  
524 *Emb<sup>-/-</sup>*, and five *Emb<sup>+/-</sup>* embryos at E17.5 and analyzed with VetScan Comprehensive  
525 Diagnostic Profile reagent rotor (Abaxis) used with the VetScan VS2 Chemistry Analyzer  
526 (Abaxis). Alkaline phosphatase activity (U/l) and the molar concentrations (mmol/l) of  
527 sodium, calcium, and glucose were determined.

528

## 529 **STATISTICAL ANALYSIS**

530 IBM SPSS Statistics software (version 25, IBM) was used for all statistical analyses.  
531 Correlation between the frequency of each genotype and embryonic stage, as well as the  
532 correlation between the body weight of the mouse and relative area of airways in the lung  
533 sections, were analyzed with the Spearman's rank correlation test. Statistical significance of  
534 the differences of the relative area of the airways between WT and *Emb<sup>-/-</sup>* mice was  
535 determined with Mann-Whitney U-test. The significance of the weight difference between  
536 WT and *Emb<sup>-/-</sup>* pups was analyzed statistically by Student's T-test for independent samples.  
537 When amniotic fluids were analyzed, the normality of the data was checked with the Shapiro-  
538 Wilk test and Levene's test was used to determine the equal variances. Normally distributed

539 alkaline phosphatase data were analyzed using ANOVA ( $p = 0.039$ ) followed by Dunnett's  
540 two-sided t-test. Normally distributed  $\text{Ca}^{2+}$  was analyzed with ANOVA ( $p = 0.219$ ) only. A  
541 nonparametric alternative for ANOVA, Kruskal-Wallis H-test with exact p-value, was used  
542 for glucose and sodium data. A p-value of less than 0.05 was considered statistically  
543 significant. Statistical details of the experiments can be found in the figures and in the figure  
544 legends.

## 545 **Acknowledgements**

546 The authors would like to thank the personnel of Turku Center for Disease Modeling for  
547 assistance. We are grateful for the personnel in the Central Animal Laboratory of the  
548 University of Turku. Maria Tuominen is acknowledged for excellent technical assistance.

## 549 **Competing interests**

550 No competing interests declared.

## 551 **Funding**

552 This study has been financially supported by grants from the Academy of Finland [259769  
553 to JH], Sigrid Juséliuksen Foundation [to JH], Cancer Society of Finland [to JH], and The  
554 Finnish Foundation for Cardiovascular Research [to JH].

## 555 **Data availability**

556 RNA-seq data have been deposited in the ArrayExpress database at EMBL-EBI  
557 ([www.ebi.ac.uk/arrayexpress](http://www.ebi.ac.uk/arrayexpress)) under accession number E-MTAB-10641 (Username:  
558 Reviewer\_E-MTAB-10641, Password: bdvimnnp).

559

560

## References

- 561 **Amuti, S., Tang, Y., Wu, S., Liu, L., Huang, L., Zhang, H., Li, H., Jiang, F., Wang, G.,**  
562 **Liu, X. et al.** (2016). Neuroplastin 65 Mediates Cognitive Functions Via  
563 Excitatory/Inhibitory Synapse Imbalance and ERK Signal Pathway. *Neurobiol Learn Mem*  
564 **127**, 72-83.
- 565 **Anders, S., Pyl, P. T. and Huber, W.** (2015). HTSeq—a Python Framework to Work with  
566 High-Throughput Sequencing Data. *Bioinformatics* **31**, 166-169.
- 567 **Bai, Y., Huang, W., Ma, L., Jiang, J. and Chen, Z.** (2014). Importance of N-Glycosylation  
568 on CD147 for its Biological Functions. *Int J Mol Sci* **15**, 6356-6377.
- 569 **Becker, H. M., Hirnet, D., Fecher-Trost, C., Sültemeyer, D. and Deitmer, J. W.** (2005).  
570 Transport Activity of MCT1 Expressed in *Xenopus* Oocytes is Increased by Interaction with  
571 Carbonic Anhydrase. *J. Biol. Chem.* **280**, 39882-39889.
- 572 **Becker, H. M., Klier, M. and Deitmer, J. W.** (2010). Nonenzymatic Augmentation of  
573 Lactate Transport Via Monocarboxylate Transporter Isoform 4 by Carbonic Anhydrase II.  
574 *J. Membr. Biol.* **234**, 125-135.
- 575 **Beesley, P. W., Herrera-Molina, R., Smalla, K. and Seidenbecher, C.** (2014). The  
576 Neuroplastin Adhesion Molecules: Key Regulators of Neuronal Plasticity and Synaptic  
577 Function. *J. Neurochem.* **131**, 268-283.
- 578 **Brocklehurst, D. and Wilde, C. E.** (1980). Amniotic Fluid Alkaline Phosphatase, Gamma-  
579 Glutamyltransferase, and 5'-Nucleotidase Activity from 13 to 40 Weeks' Gestation, and  
580 Alkaline Phosphatase as an Index of Fetal Lung Maturity. *Clin. Chem.* **26**, 588-591.

- 581 **Carrott, L., Bowl, M. R., Aguilar, C., Johnson, S. L., Chessum, L., West, M., Morse, S.,**  
582 **Dorning, J., Smart, E., Hardisty-Hughes, R. et al.** (2016). Absence of Neuroplastin-65  
583 Affects Synaptogenesis in Mouse Inner Hair Cells and Causes Profound Hearing Loss. *J.*  
584 *Neurosci.* **36**, 222-234.
- 585 **Chao, F., Zhang, J., Zhang, Y., Liu, H., Yang, C., Wang, J., Guo, Y., Wen, X., Zhang,**  
586 **K., Huang, B. et al.** (2015). Embigin, Regulated by HOXC8, Plays a Suppressive Role in  
587 Breast Tumorigenesis. *Oncotarget* **6**, 23496-23509.
- 588 **Cheung, C. Y. and Brace, R. A.** (2005). Amniotic Fluid Volume and Composition in  
589 Mouse Pregnancy. *J. Soc. Gynecol. Investig.* **12**, 558-562.
- 590 **Dange, M. C., Bhonsle, H. S., Godbole, R. K., More, S. K., Bane, S. M., Kulkarni, M. J.**  
591 **and Kalraiya, R. D.** (2017). Mass Spectrometry Based Identification of Galectin-3  
592 Interacting Proteins Potentially Involved in Lung Melanoma Metastasis. *Mol Biosyst* **13**,  
593 2303-2309.
- 594 **Dobin, A., Davis, C. A., Schlesinger, F., Drenkow, J., Zaleski, C., Jha, S., Batut, P.,**  
595 **Chaisson, M. and Gingeras, T. R.** (2013). STAR: Ultrafast Universal RNA-Seq Aligner.  
596 *Bioinformatics* **29**, 15-21.
- 597 **Fan, Q. W., Kadomatsu, K., Uchimura, K. and Muramatsu, T.** (1998). Embigin/Basigin  
598 Subgroup of the Immunoglobulin Superfamily: Different Modes of Expression during  
599 Mouse Embryogenesis and Correlated Expression with Carbohydrate Antigenic Markers.  
600 *Dev. Growth Differ.* **40**, 277-286.

- 601 **Fisel, P., Schaeffeler, E. and Schwab, M.** (2018). Clinical and Functional Relevance of  
602 the Monocarboxylate Transporter Family in Disease Pathophysiology and Drug Therapy.  
603 *Clin Transl Sci* **11**, 352-364.
- 604 **Forero-Quintero, L. S., Ames, S., Schneider, H., Thyssen, A., Boone, C. D., Andring,**  
605 **J. T., McKenna, R., Casey, J. R., Deitmer, J. W. and Becker, H. M.** (2019). Membrane-  
606 Anchored Carbonic Anhydrase IV Interacts with Monocarboxylate Transporters Via their  
607 Chaperones CD147 and GP70. *J. Biol. Chem.* **294**, 593-607.
- 608 **Green, E., Todd, B. and Heath, D.** (1990). Mechanism of Glucocorticoid Regulation of  
609 Alkaline Phosphatase Gene Expression in Osteoblast-Like Cells. *Eur. J. Biochem.* **188**,  
610 147-153.
- 611 **Grier, D. G. and Halliday, H. L.** (2004). Effects of Glucocorticoids on Fetal and Neonatal  
612 Lung Development. *Treat Respir Med* **3**, 295-306.
- 613 **Guenette, R. S., Sridhar, S., Herley, M., Mooibroek, M., Wong, P. and Tenniswood, M.**  
614 (1997). Embigin, a Developmentally Expressed Member of the Immunoglobulin Super  
615 Family, is also Expressed during Regression of Prostate and Mammary Gland. *Dev.*  
616 *Genet.* **21**, 268-278.
- 617 **Hahn, J. N., Kaushik, D. K. and Yong, V. W.** (2015). The Role of EMMPRIN in T Cell  
618 Biology and Immunological Diseases. *J. Leukoc. Biol.* **98**, 33-48.
- 619 **Halestrap, A. P.** (2013). The SLC16 Gene Family - Structure, Role and Regulation in  
620 Health and Disease. *Mol. Aspects Med.* **34**, 337-349.



- 621 **Hanna, S. M., Kirk, P., Holt, O. J., Puklavec, M. J., Brown, M. H. and Barclay, A. N.**  
622 (2003). A Novel Form of the Membrane Protein CD147 that Contains an Extra Ig-Like  
623 Domain and Interacts Homophilically. *BMC Biochem.* **4**, 17.
- 624 **Hill, I. E., Selkirk, C. P., Hawkes, R. B. and Beesley, P. W.** (1988). Characterization of  
625 Novel Glycoprotein Components of Synaptic Membranes and Postsynaptic Densities,  
626 gp65 and gp55, with a Monoclonal Antibody. *Brain Res.* **461**, 27-43.
- 627 **Huang, R. P., Ozawa, M., Kadomatsu, K. and Muramatsu, T.** (1990). Developmentally  
628 Regulated Expression of Embigin, a Member of the Immunoglobulin Superfamily found in  
629 Embryonal Carcinoma Cells. *Differentiation* **45**, 76-83.
- 630 **Huang, R. P., Ozawa, M., Kadomatsu, K. and Muramatsu, T.** (1993). Embigin, a  
631 Member of the Immunoglobulin Superfamily Expressed in Embryonic Cells, Enhances  
632 Cell-Substratum Adhesion. *Dev. Biol.* **155**, 307-314.
- 633 **Igakura, T., Kadomatsu, K., Kaname, T., Muramatsu, H., Fan, Q. W., Miyauchi, T.,**  
634 **Toyama, Y., Kuno, N., Yuasa, S., Takahashi, M. et al.** (1998). A Null Mutation in Basigin,  
635 an Immunoglobulin Superfamily Member, Indicates its Important Roles in Peri-Implantation  
636 Development and Spermatogenesis. *Dev. Biol.* **194**, 152-165.
- 637 **Jung, D. E., Kim, J. M., Kim, C. and Song, S. Y.** (2016). Embigin is Overexpressed in  
638 Pancreatic Ductal Adenocarcinoma and Regulates Cell Motility through Epithelial to  
639 Mesenchymal Transition Via the TGF- $\beta$  Pathway. *Mol. Carcinog.* **55**, 633-645.
- 640 **Kallio, M. A., Tuimala, J. T., Hupponen, T., Klemelä, P., Gentile, M., Scheinin, I.,**  
641 **Koski, M., Käki, J. and Korpelainen, E. I.** (2011). Chipster: User-Friendly Analysis  
642 Software for Microarray and Other High-Throughput Data. *BMC Genomics* **12**, 507.

- 643 **Kirk, P., Wilson, M. C., Heddle, C., Brown, M. H., Barclay, A. N. and Halestrap, A. P.**  
644 (2000). CD147 is Tightly Associated with Lactate Transporters MCT1 and MCT4 and  
645 Facilitates their Cell Surface Expression. *EMBO J.* **19**, 3896-3904.
- 646 **Klier, M., Schüler, C., Halestrap, A. P., Sly, W. S., Deitmer, J. W. and Becker, H. M.**  
647 (2011). Transport Activity of the High-Affinity Monocarboxylate Transporter MCT2 is  
648 Enhanced by Extracellular Carbonic Anhydrase IV but Not by Intracellular Carbonic  
649 Anhydrase II. *J. Biol. Chem.* **286**, 27781-27791.
- 650 **Kuno, N., Kadomatsu, K., Fan, Q. W., Hagihara, M., Senda, T., Mizutani, S. and**  
651 **Muramatsu, T.** (1998). Female Sterility in Mice Lacking the Basigin Gene, which Encodes  
652 a Transmembrane Glycoprotein Belonging to the Immunoglobulin Superfamily. *FEBS Lett.*  
653 **425**, 191-194.
- 654 **Kurotani, R., Tomita, T., Yang, Q., Carlson, B. A., Chen, C. and Kimura, S.** (2008).  
655 Role of Secretoglobin 3A2 in Lung Development. *Am J Respir Crit Care Med* **178**, 389-  
656 398.
- 657 **Langnaese, K., Beesley, P. W. and Gundelfinger, E. D.** (1997). Synaptic Membrane  
658 Glycoproteins gp65 and gp55 are New Members of the Immunoglobulin Superfamily. *J.*  
659 *Biol. Chem.* **272**, 821-827.
- 660 **Liao, C., Kong, L., Song, F., Xing, J., Wang, L., Sun, Z., Tang, H., Yao, H., Zhang, Y.,**  
661 **Wang, L. et al.** (2011). Characterization of Basigin Isoforms and the Inhibitory Function of  
662 Basigin-3 in Human Hepatocellular Carcinoma Proliferation and Invasion. *Mol. Cell. Biol.*  
663 **31**, 2591-2604.

- 664 **Liao, Y., Wang, J., Jaehnig, E. J., Shi, Z. and Zhang, B.** (2019). WebGestalt 2019: Gene  
665 Set Analysis Toolkit with Revamped UIs and APIs. *Nucleic Acids Res.* **47**, W199-W205.
- 666 **Love, M. I., Huber, W. and Anders, S.** (2014). Moderated Estimation of Fold Change and  
667 Dispersion for RNA-Seq Data with DESeq2. *Genome Biol.* **15**, 550.
- 668 **Lu, T., Lin, X., Pan, Y., Yang, N., Ye, S., Zhang, Q., Wang, C., Zhu, R., Zhang, T.,**  
669 **Wisniewski, T. M. et al.** (2020). ADAMTS18 Deficiency Leads to Pulmonary Hypoplasia  
670 and Bronchial Microfibril Accumulation. *iScience* **23**, 101472.
- 671 **Muramatsu, T. and Miyauchi, T.** (2003). Basigin (CD147): A Multifunctional  
672 Transmembrane Protein Involved in Reproduction, Neural Function, Inflammation and  
673 Tumor Invasion. *Histol. Histopathol.* **18**, 981-987.
- 674 **Nabeshima, K., Iwasaki, H., Koga, K., Hojo, H., Suzumiya, J. and Kikuchi, M.** (2006).  
675 Emmprin (Basigin/CD147): Matrix Metalloproteinase Modulator and Multifunctional Cell  
676 Recognition Molecule that Plays a Critical Role in Cancer Progression. *Pathol. Int.* **56**,  
677 359-367.
- 678 **Ochrietor, J. D., Moroz, T. P., van Ekeris, L., Clamp, M. F., Jefferson, S. C.,**  
679 **deCarvalho, A. C., Fadool, J. M., Wistow, G., Muramatsu, T. and Linser, P. J.** (2003).  
680 Retina-Specific Expression of 5A11/Basigin-2, a Member of the Immunoglobulin Gene  
681 Superfamily. *Invest. Ophthalmol. Vis. Sci.* **44**, 4086-4096.
- 682 **Ozawa, M., Huang, R. P., Furukawa, T. and Muramatsu, T.** (1988). A Teratocarcinoma  
683 Glycoprotein Carrying a Developmentally Regulated Carbohydrate Marker is a Member of  
684 the Immunoglobulin Gene Superfamily. *J. Biol. Chem.* **263**, 3059-3062.

- 685 **Perez-Garcia, V., Fineberg, E., Wilson, R., Murray, A., Mazzeo, C. I., Tudor, C.,**  
686 **Sienerth, A., White, J. K., Tuck, E., Ryder, E. J. et al.** (2018). Placentation Defects are  
687 Highly Prevalent in Embryonic Lethal Mouse Mutants. *Nature* **555**, 463-468.
- 688 **Pridans, C., Holmes, M. L., Polli, M., Wettenhall, J. M., Dakic, A., Corcoran, L. M.,**  
689 **Smyth, G. K. and Nutt, S. L.** (2008). Identification of Pax5 Target Genes in Early B Cell  
690 Differentiation. *J. Immunol.* **180**, 1719-1728.
- 691 **Riethdorf, S., Reimers, N., Assmann, V., Kornfeld, J., Terracciano, L., Sauter, G. and**  
692 **Pantel, K.** (2006). High Incidence of EMMPRIN Expression in Human Tumors. *Int. J.*  
693 *Cancer* **119**, 1800-1810.
- 694 **Robinson, M. D., McCarthy, D. J. and Smyth, G. K.** (2010). edgeR: A Bioconductor  
695 Package for Differential Expression Analysis of Digital Gene Expression Data.  
696 *Bioinformatics* **26**, 139-140.
- 697 **Ruma, I. M. W., Kinoshita, R., Tomonobu, N., Inoue, Y., Kondo, E., Yamauchi, A.,**  
698 **Sato, H., Sumardika, I. W., Chen, Y., Yamamoto, K. et al.** (2018). Embigin Promotes  
699 Prostate Cancer Progression by S100A4-Dependent and-Independent Mechanisms.  
700 *Cancers (Basel)* **10**,.
- 701 **Sasaki, T. and Kahn, M.** (2014). Inhibition of B-Catenin/p300 Interaction Proximalizes  
702 Mouse Embryonic Lung Epithelium. *Transl Respir Med* **2**, 8.
- 703 **Schindelin, J., Arganda-Carreras, I., Frise, E., Kaynig, V., Longair, M., Pietzsch, T.,**  
704 **Preibisch, S., Rueden, C., Saalfeld, S., Schmid, B. et al.** (2012). Fiji: An Open-Source  
705 Platform for Biological-Image Analysis. *Nat. Methods* **9**, 676-682.

- 706 **Silberstein, L., Goncalves, K. A., Kharchenko, P. V., Turcotte, R., Kfoury, Y., Mercier,**  
707 **F., Baryawno, N., Severe, N., Bachand, J., Spencer, J. A. et al. (2016).** Proximity-Based  
708 Differential Single-Cell Analysis of the Niche to Identify Stem/Progenitor Cell Regulators.  
709 *Cell Stem Cell* **19**, 530-543.
- 710 **Singh, I., Mehta, A., Contreras, A., Boettger, T., Carraro, G., Wheeler, M., Cabrera-**  
711 **Fuentes, H. A., Bellusci, S., Seeger, W., Braun, T. et al. (2014).** Hmga2 is Required for  
712 Canonical WNT Signaling during Lung Development. *BMC Biol* **12**, 21.
- 713 **Skiba, N. P., Cady, M. A., Molday, L., Han, J. Y. S., Lewis, T. R., Spencer, W. J.,**  
714 **Thompson, W. J., Hiles, S., Philp, N. J., Molday, R. S. et al. (2021).** *Authors*, pp.  
715 100088: Open Book Publishers.
- 716 **Smalla, K. H., Matthies, H., Langnäse, K., Shabir, S., Böckers, T. M., Wyneken, U.,**  
717 **Staak, S., Krug, M., Beesley, P. W. and Gundelfinger, E. D. (2000).** The Synaptic  
718 Glycoprotein Neuroplastin is Involved in Long-Term Potentiation at Hippocampal CA1  
719 Synapses. *Proc. Natl. Acad. Sci. U. S. A.* **97**, 4327-4332.
- 720 **Tang, W., Chang, S. B. and Hemler, M. E. (2004).** Links between CD147 Function,  
721 Glycosylation, and Caveolin-1. *Mol. Biol. Cell* **15**, 4043-4050.
- 722 **The Tabula Muris Consortium. (2018).** Single-Cell Transcriptomics of 20 Mouse Organs  
723 Creates a Tabula Muris. *Nature* **562**, 367-372.
- 724 **Warburton, D., El-Hashash, A., Carraro, G., Tiozzo, C., Sala, F., Rogers, O., De**  
725 **Langhe, S., Kemp, P. J., Riccardi, D., Torday, J. et al. (2010).** Lung Organogenesis.  
726 *Curr. Top. Dev. Biol.* **90**, 73-158.

- 727 **Williams, A. F. and Barclay, A. N.** (1988). The Immunoglobulin Superfamily--Domains for  
728 Cell Surface Recognition. *Annu. Rev. Immunol.* **6**, 381-405.
- 729 **Wilson, M. C., Meredith, D., Fox, J. E. M., Manoharan, C., Davies, A. J. and Halestrap,**  
730 **A. P.** (2005). Basigin (CD147) is the Target for Organomercurial Inhibition of  
731 Monocarboxylate Transporter Isoforms 1 and 4: The Ancillary Protein for the Insensitive  
732 MCT2 is EMBIGIN (gp70). *J. Biol. Chem.* **280**, 27213-27221.
- 733 **Yokomizo, T., Yamada-Inagawa, T., Yzaguirre, A. D., Chen, M. J., Speck, N. A. and**  
734 **Dzierzak, E.** (2012). Whole-Mount Three-Dimensional Imaging of Internally Localized  
735 Immunostained Cells within Mouse Embryos. *Nat Protoc* **7**, 421-431.
- 736 **Yoshida, S., Shibata, M., Yamamoto, S., Hagihara, M., Asai, N., Takahashi, M.,**  
737 **Mizutani, S., Muramatsu, T. and Kadomatsu, K.** (2000). Homo-Oligomer Formation by  
738 Basigin, an Immunoglobulin Superfamily Member, Via its N-Terminal Immunoglobulin  
739 Domain. *Eur. J. Biochem.* **267**, 4372-4380.
- 740 **Yu, X., Hu, T., Du, J., Ding, J., Yang, X., Zhang, J., Yang, B., Shen, X., Zhang, Z.,**  
741 **Zhong, W. et al.** (2008). Crystal Structure of HAb18G/CD147: Implications for  
742 Immunoglobulin Superfamily Homophilic Adhesion. *J. Biol. Chem.* **283**, 18056-18065.
- 743

744 **Figure legends**

745

746 **Figure 1 – Embigin is widely expressed until E10.5 and after that in specific organs.**

747 (A) WT mouse embryos at embryonic days E8.5, E9.5 and E10.5 were stained with embigin  
748 and  $\alpha$ -smooth muscle actin ( $\alpha$ -SMA) antibodies by using the whole-mount immunostaining  
749 technique. As the negative control, secondary antibody only was used;  $\alpha$ -SMA was stained  
750 as a positive control. Representative images are shown. Scale bars: 500  $\mu$ m.

751 (B – D) The paraffin sections of the kidney (B), lung (C), skin, epididymis, and testis (D) were  
752 immunostained with embigin and collagen I antibodies. Collagen I was stained as a positive  
753 control. Samples were collected at E17.5 (B, C), postnatal day P3 (B, C), and four-month-  
754 old mice (B, C, D). Scale bars: 100  $\mu$ m.

755 (E) Embigin expression in protein samples extracted from four-month-old WT mouse lung,  
756 kidney, skin, epididymis, and testis tissues were studied by Western blotting.  $\beta$ -tubulin was  
757 used as a control. The blot image was cut to show only embigin positive organs.

758

759 **Figure 2 – Embigin deficiency increases mortality from embryonic day E8.5 to P3.**

760 (A) The relative frequency of the genotypes of the pups from heterozygous  $Emb^{+/-}$  breedings  
761 were determined. Three litters at E8.5; 6 litters at E9.5; 1 litter at E10.5, E11.5, and E14.5;  
762 2 litters at E16.5, and 10 litters at E17.5 were examined ( $n$  = number of pups analyzed).  
763 Correlation between the frequency of each genotype and the embryonic stage was analyzed  
764 by calculating Spearman's rank correlation coefficient ( $r_s$ ) and its statistical significance.

765 (B) The relative frequency of the genotypes of the pups from  $Emb^{+/-}$  breedings were  
766 determined. 284 pups from 40 litters were analyzed at P14-P21.

767 (C) To determinate the postnatal survival frequency of the  $Emb^{-/-}$  mice, 100 pups from 17  
768 litters and 6 different  $Emb^{+/-}$  breedings were followed after birth. The genotypes were  
769 determined after the death of the pup.

770

771

772 **Figure 3 – The smaller size of *Emb<sup>-/-</sup>* embryos is not caused by a placental failure.**

773 (A) Representative images of WT and *Emb<sup>-/-</sup>* mice are shown at E11.5, E14.5, and E17.5.

774 (B) Six litters with 53 pups from *Emb<sup>+/-</sup>* breedings were analyzed at E17.5. The significance  
775 of the weight difference between WT and *Emb<sup>-/-</sup>* pups were statistically analyzed by  
776 Student's T-test for independent samples. Data are represented as a Spear style box plot.  
777 A square shows the mean value.

778 (C) WT and *Emb<sup>-/-</sup>* placenta paraffin sections were immunostained with embigin and  
779 collagen I antibodies at E11.5 and E17.5. Arrowheads show fetal-derived round nuclei.  
780 Scale bars: 100  $\mu$ m.

781 (D) Representative images of hematoxylin-eosin-stained WT and *Emb<sup>-/-</sup>* placentas at E17.5  
782 are shown. The scale bar is 500  $\mu$ m. Magnifications of the inner edges of the placental  
783 labyrinth zones are shown below. The scale bar is 100  $\mu$ m.

784 (E) Heatmap of differentially expressed genes (log<sub>2</sub> of fold change above 0.6 or below -0.6  
785 and Benjamini-Hochberg-corrected p-value < 0.05) in WT (n = 5) and *Emb<sup>-/-</sup>* (n = 5)  
786 placenta at E17.5 based on RNAseq analysis.

787

788

789 **Figure 4 – Embigin deficiency delays embryonic lung development.**

790 (A) Representative images of hematoxylin-eosin stained lung sections from two WT and two  
791 *Emb<sup>-/-</sup>* E17.5 littermates are presented. Scale bars: 50  $\mu$ m.

792 (B) The relative area of airways in the E17.5 lung sections was analyzed by ImageJ/Fiji  
793 software (n = 11 for WT and n = 14 for *Emb<sup>-/-</sup>*). Statistical significance (p = 0.00002) was  
794 determined by Mann-Whitney U-test. Data are represented as a Spear style box plot. A  
795 square shows the mean value.

796 (C) Correlation between the body weight of the mouse and relative area of airways in the  
797 lung sections was studied by calculating Spearman's rank correlation coefficient ( $r_s$ ) and its  
798 statistical significance.



799 (D) Alkaline phosphatase activity was determined from the amniotic fluids of WT, Emb<sup>+/-</sup>,  
800 and Emb<sup>-/-</sup> embryos at E17.5 with VetScan Chemistry Analyzer (n = 6 for WT, and n = 5 for  
801 Emb<sup>+/-</sup> and Emb<sup>-/-</sup>). Statistical significance (p = 0.024) was determined by ANOVA followed  
802 by Dunnett's t-test. Data are represented as a Spear style box plot. A square shows the  
803 mean value.

804

### 805 **Figure 5 – Embigin depletion leads to compromised lung function.**

806 (A) Heatmap of all expressed genes in WT (n = 5) and Emb<sup>-/-</sup> (n = 5) lung and placenta at  
807 E17.5 based on RNAseq analysis. The columns (genes) have been sorted from smallest to  
808 largest fold change value of Emb<sup>-/-</sup> vs. WT comparison and visualized by Morpheus.

809 (B) Differentially expressed genes in WT (n = 5) vs. Emb<sup>-/-</sup> embryonic lungs (n = 5) at E17.5  
810 were analyzed from RNA sequencing data by WebGestalt. Top19 of the most enriched  
811 biological processes of those with FDR < 0.05 and ≥ 3 overlapping genes are shown.

812

813

### 814 **Table legend**

815

### 816 **Table 1 – Emb<sup>-/-</sup> mice are fertile.**

817 Ten Emb<sup>-/-</sup> homozygous breedings were followed until the pups were genotyped at P14-  
818 P21.

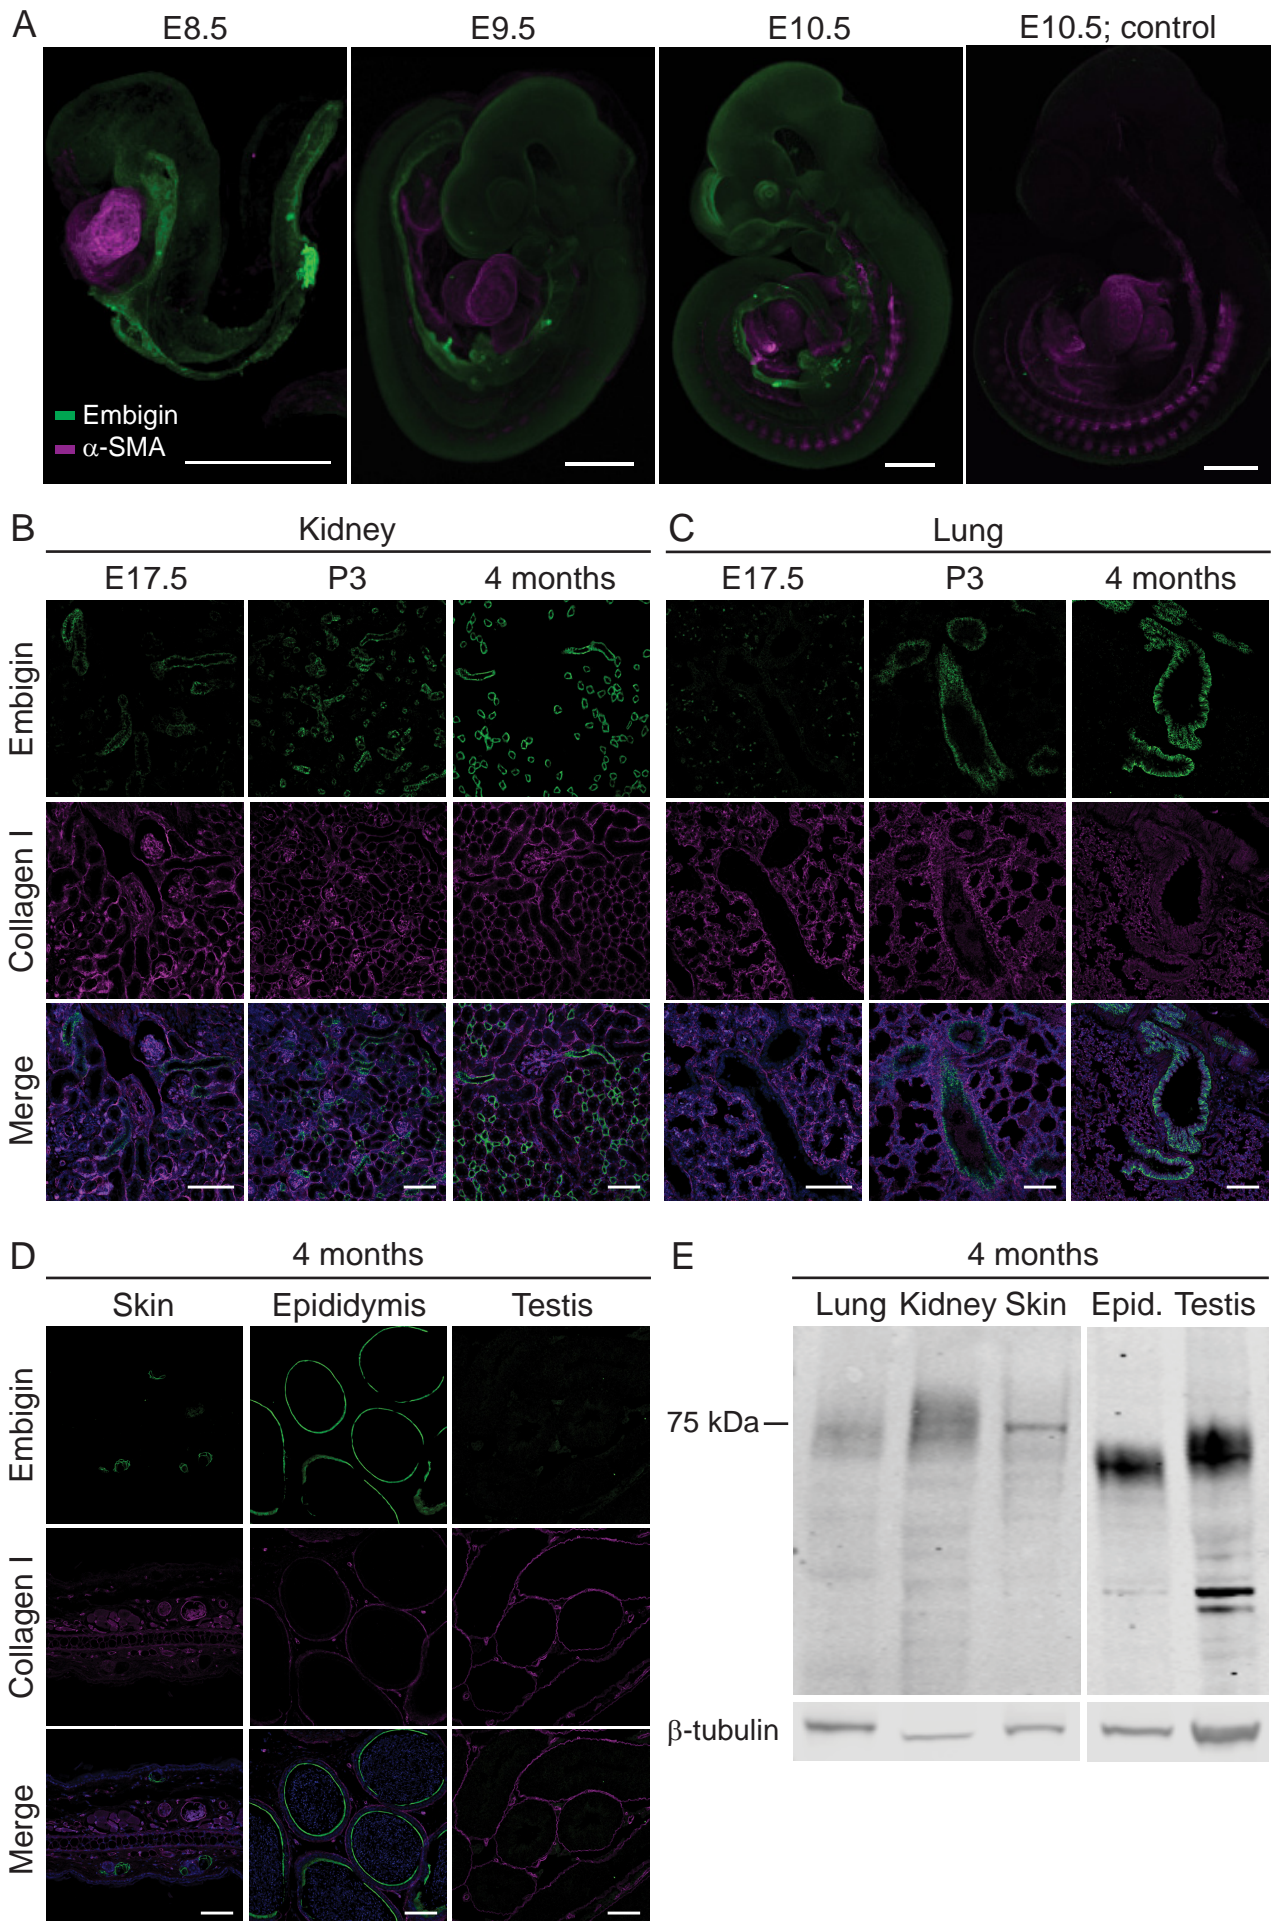

FIGURE 1

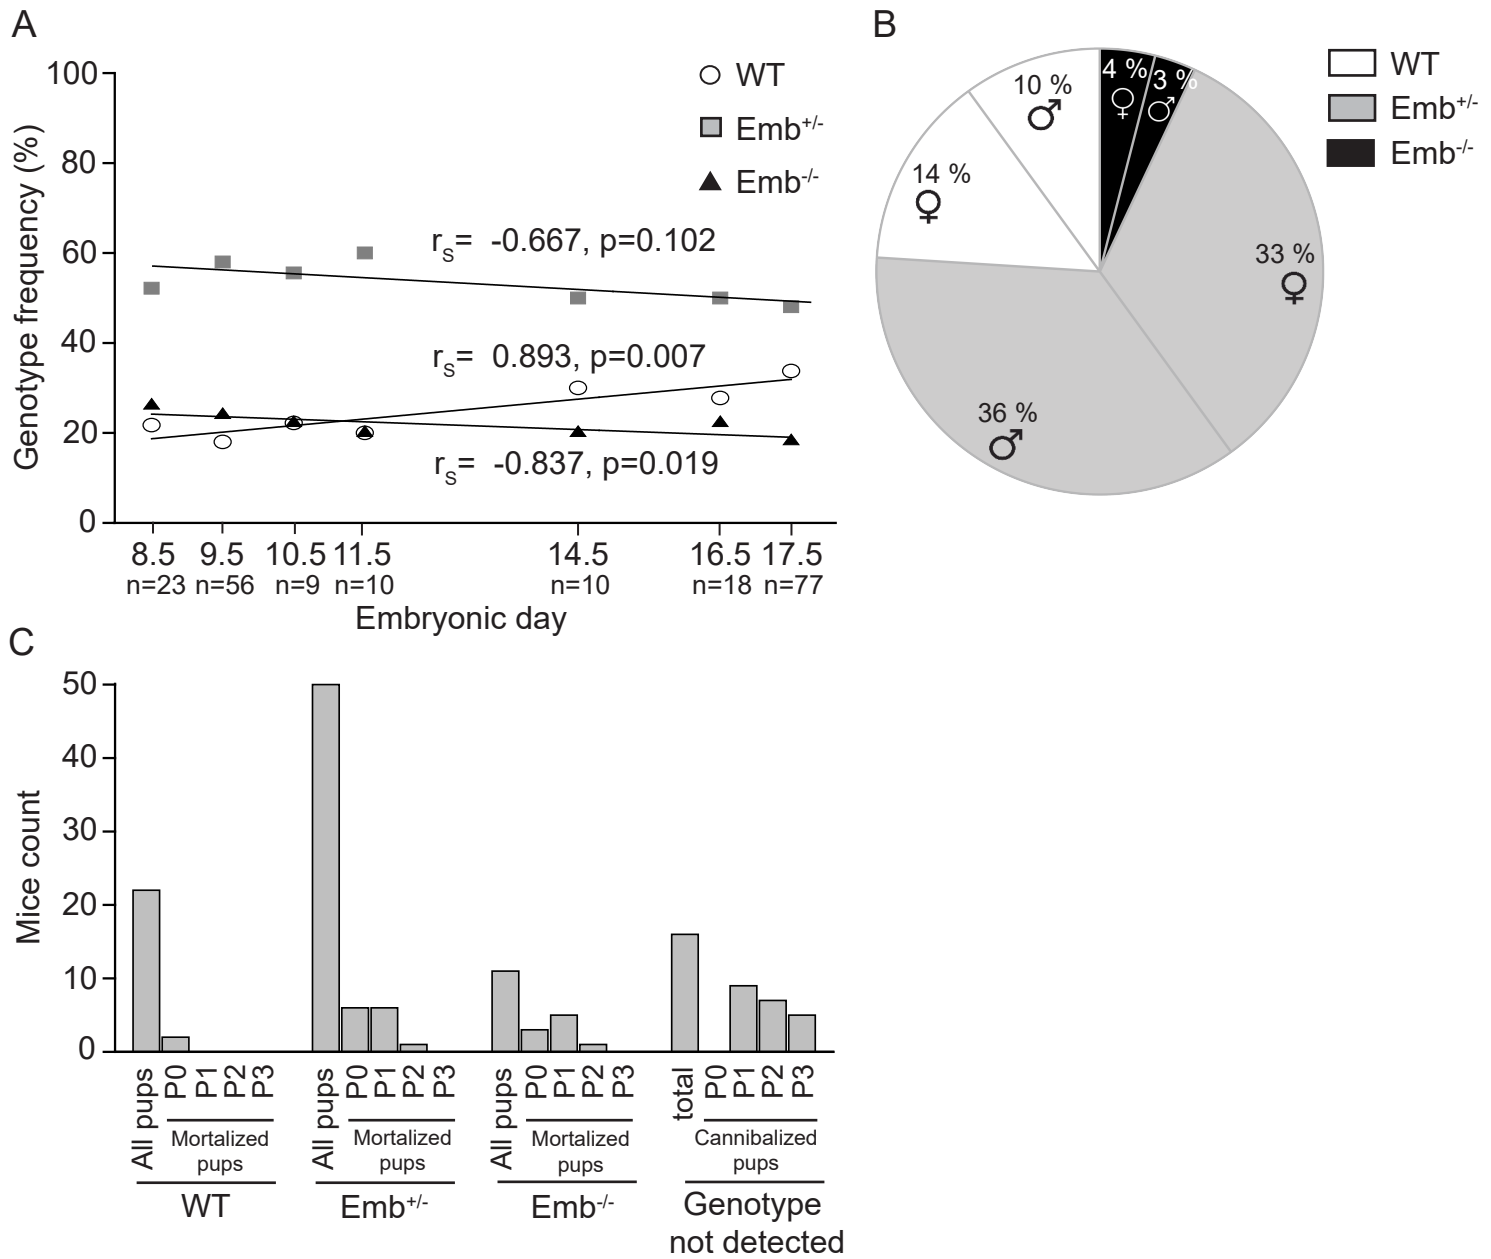

FIGURE 2

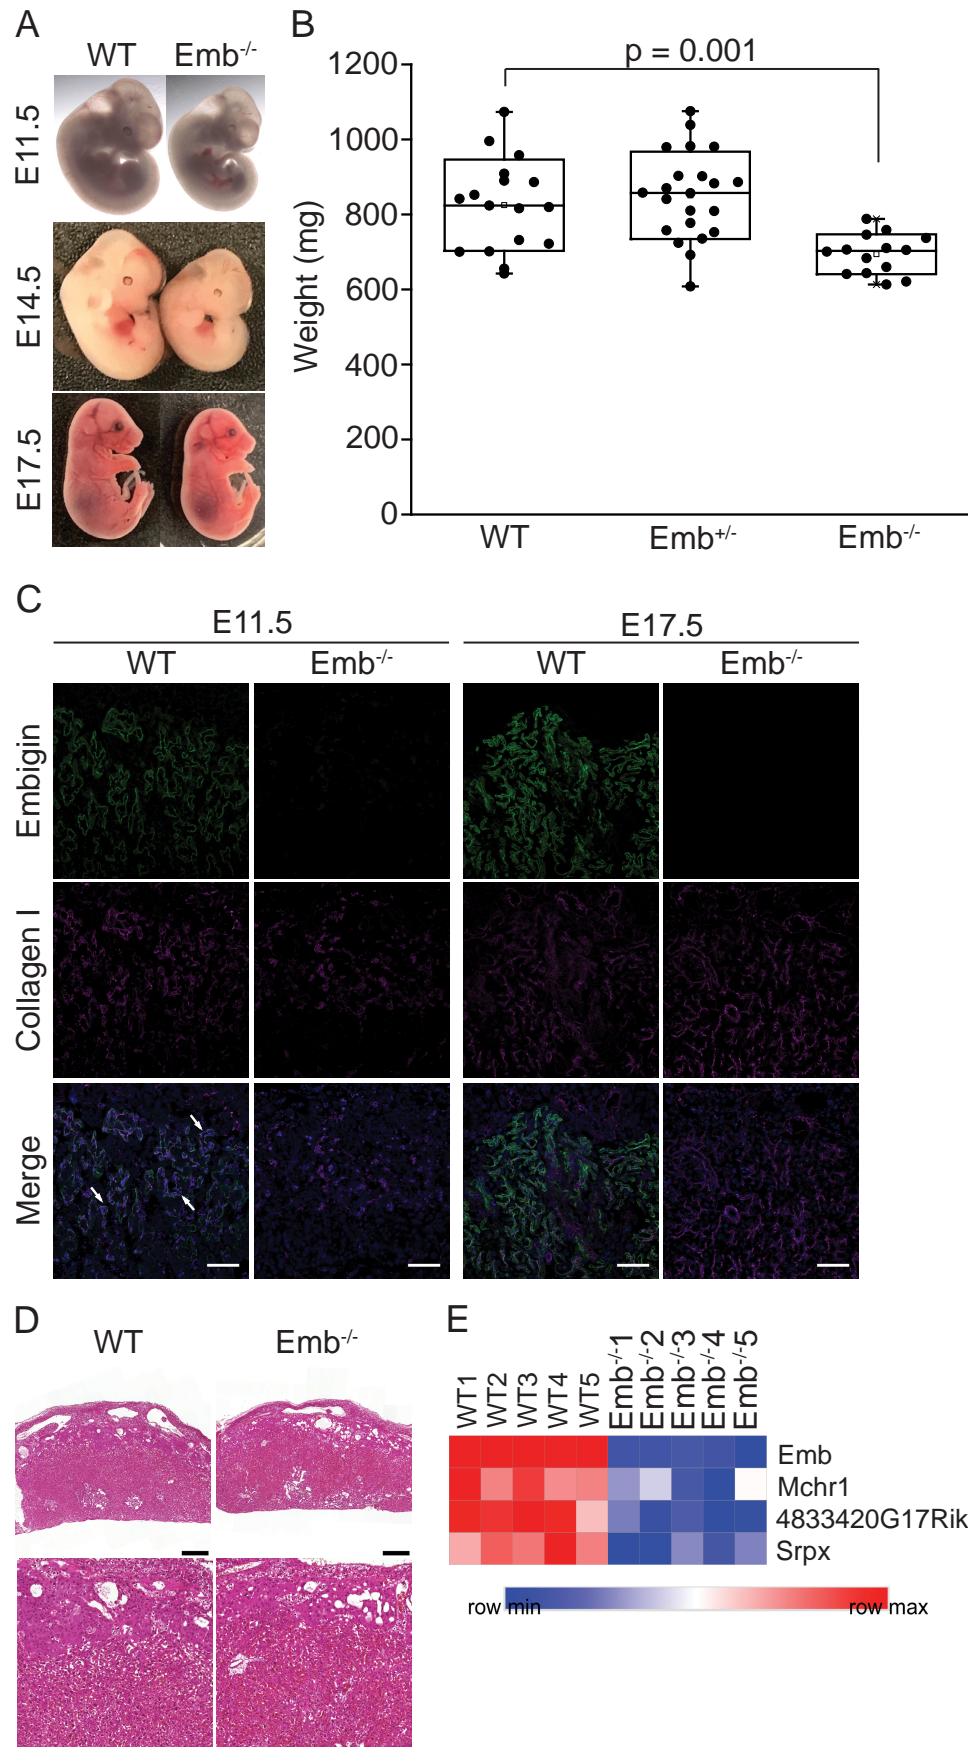

FIGURE 3

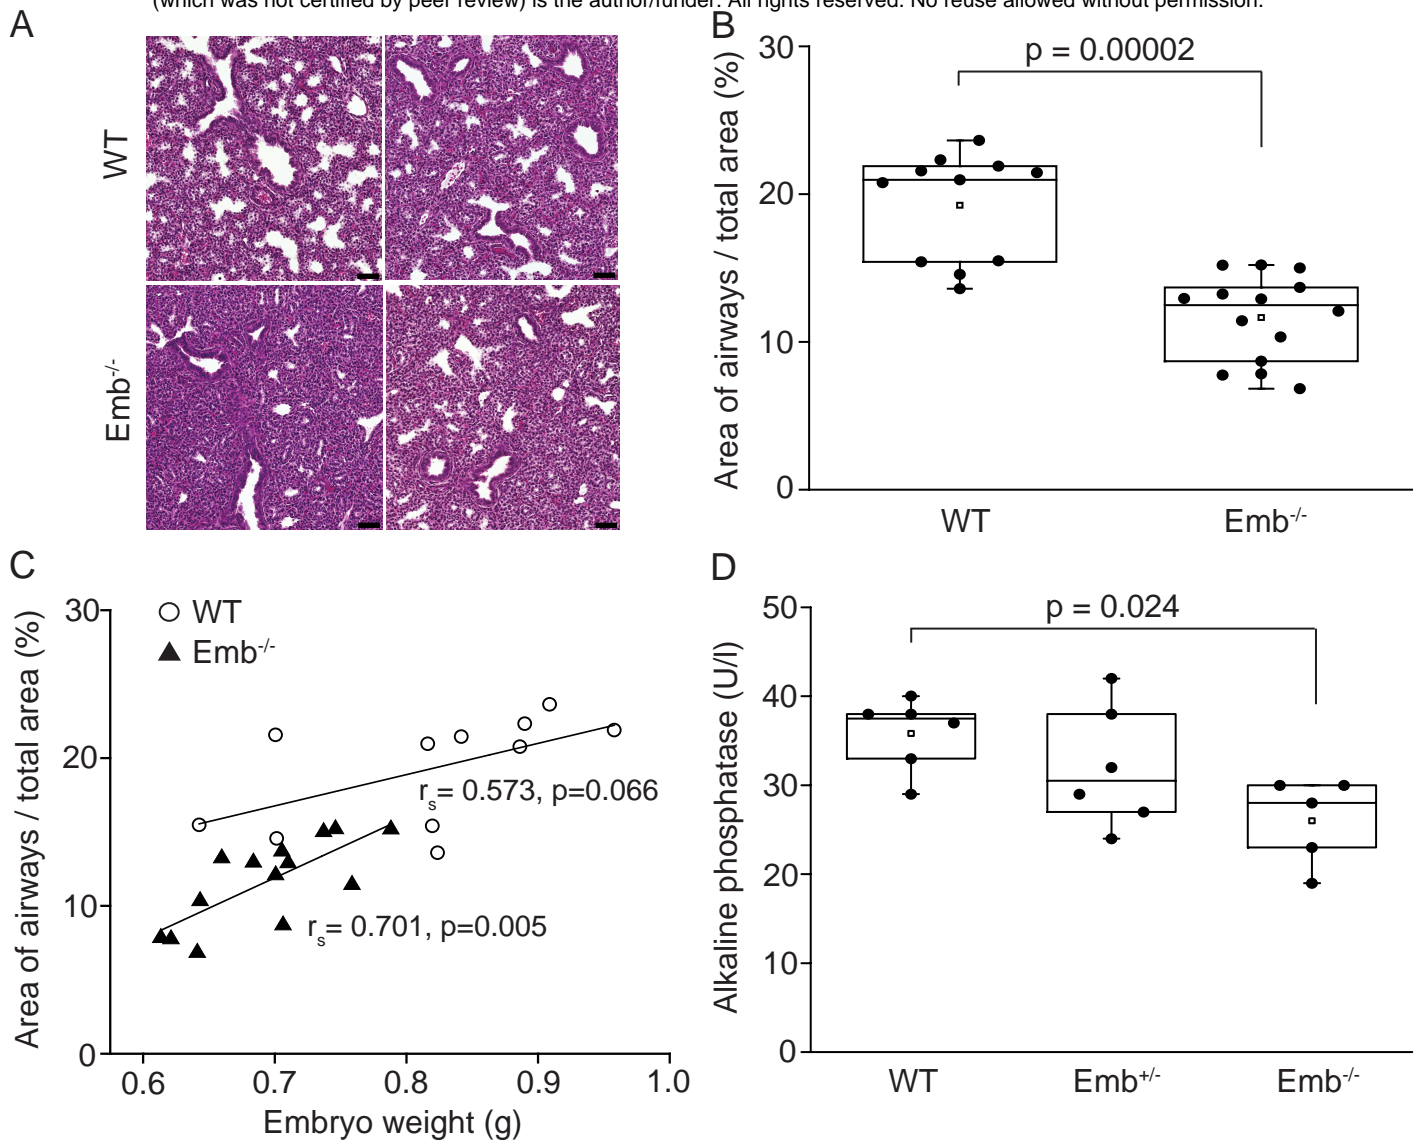

FIGURE 4

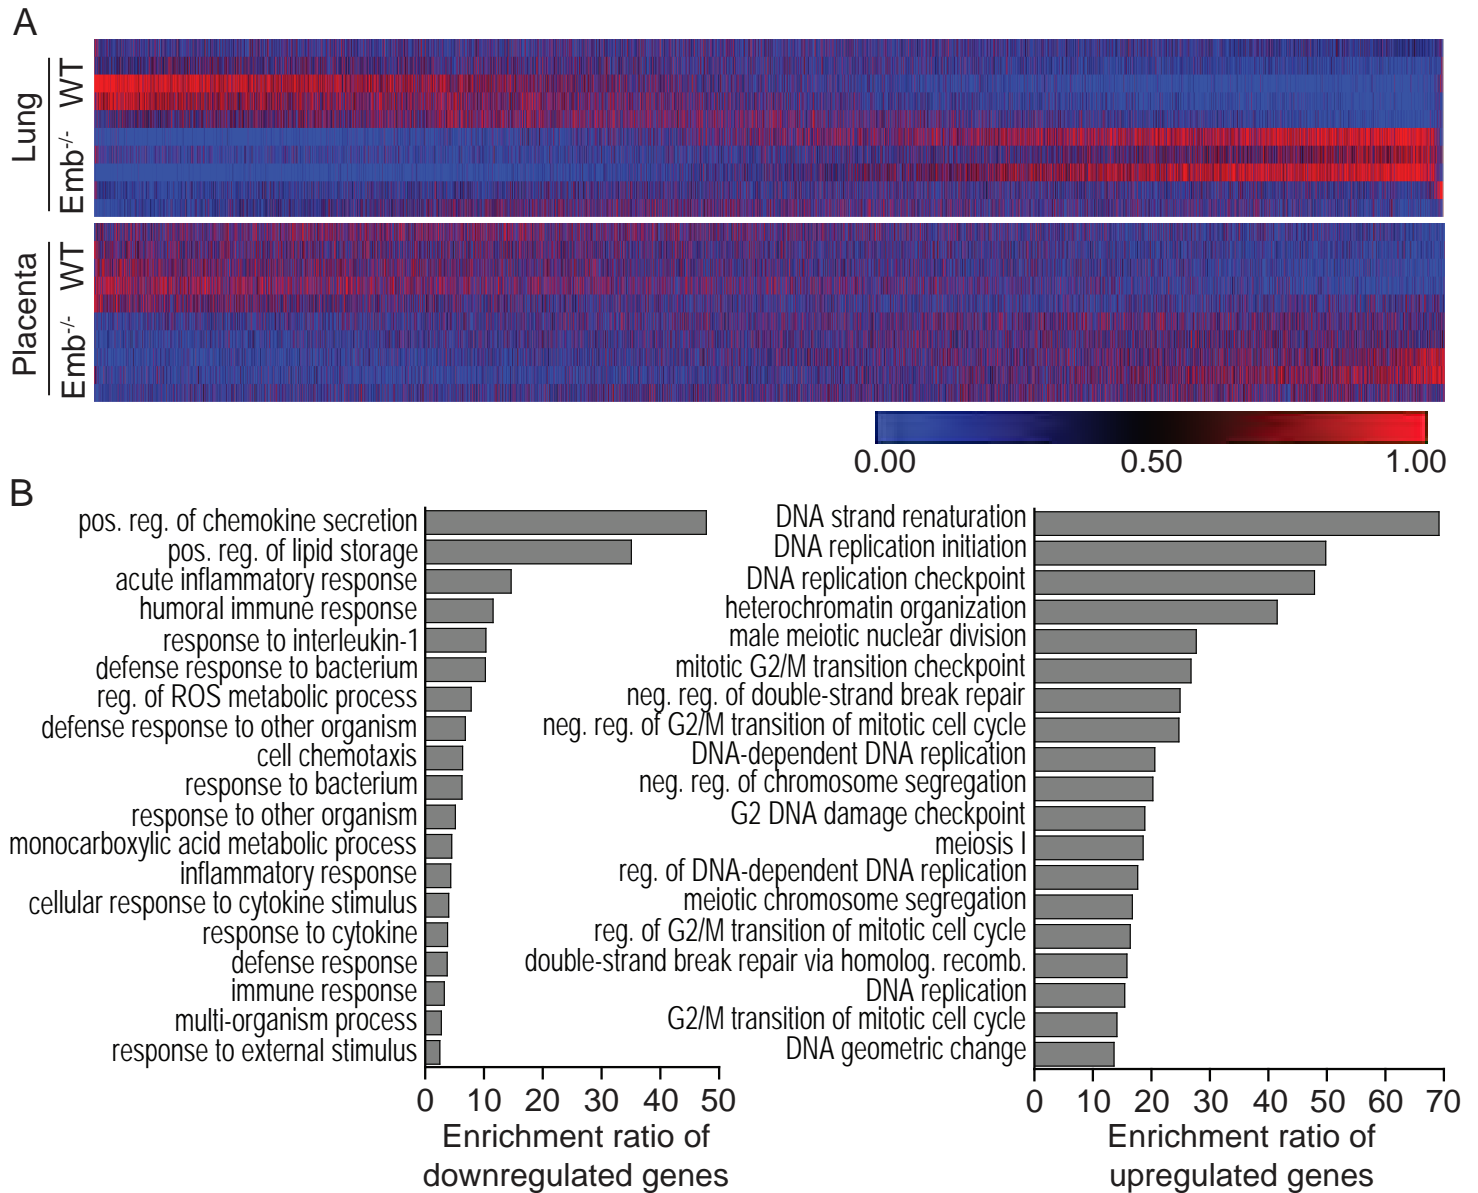

FIGURE 5

|                                                         |     |
|---------------------------------------------------------|-----|
| Emb <sup>-/-</sup> breeding pairs                       | 10  |
| Emb <sup>-/-</sup> breeding pairs with survived litters | 6   |
| Cannibalized litters                                    | 10  |
| Litters with survived pups                              | 13  |
| Survived female pups                                    | 14  |
| Survived male pups                                      | 16  |
| Average litter size                                     | 2.3 |

## **SUPPLEMENTAL DATA**



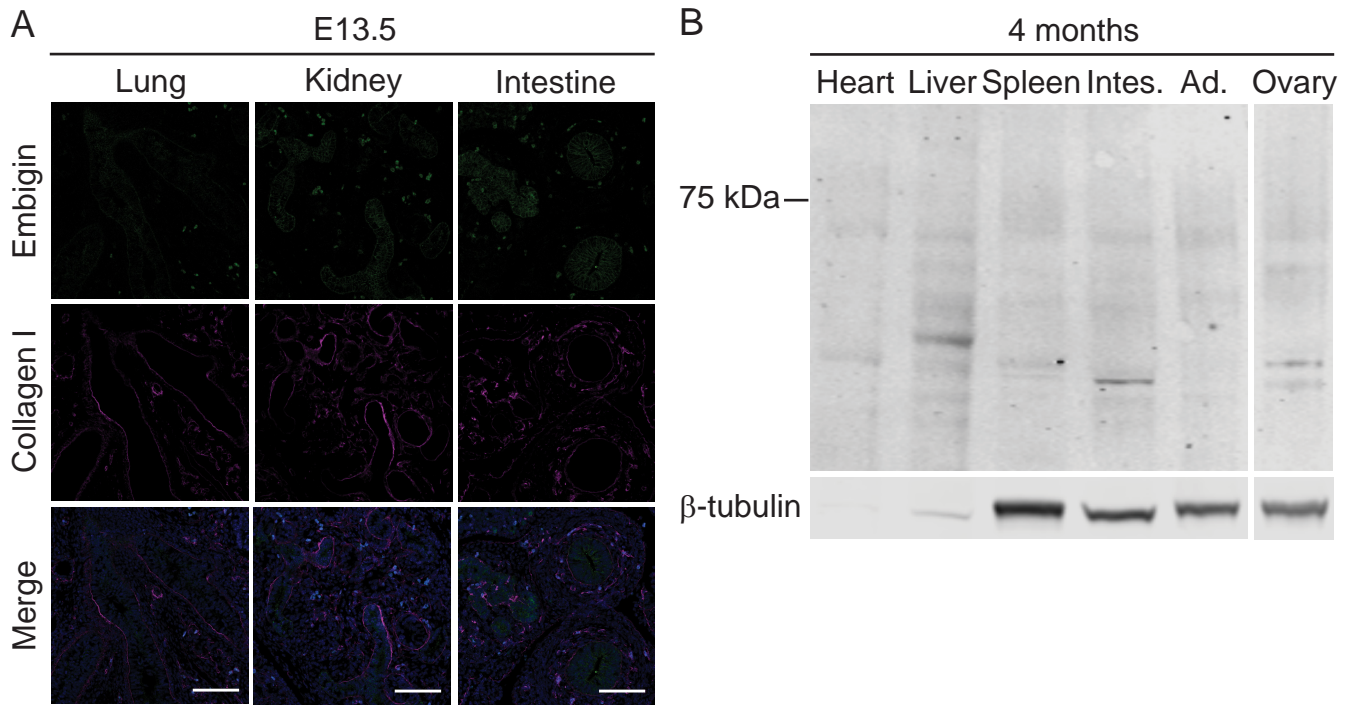

**Figure S1 – Embigin protein has a tissue-specific expression pattern.**

(A) The paraffin sections of embryos at E13.5 were immunostained with embigin and collagen I antibodies. Embigin expression in the lung, kidney and intestine is shown. Scale bars: 100  $\mu$ m.

(B) Embigin expression in protein samples extracted from four-month-old WT mouse heart, liver, spleen, small intestine (Intes.), adrenal gland (Ad.), and ovary tissues were analyzed by Western blotting.  $\beta$ -tubulin was used as a positive control. The blot image was cut to show only embigin negative organs.

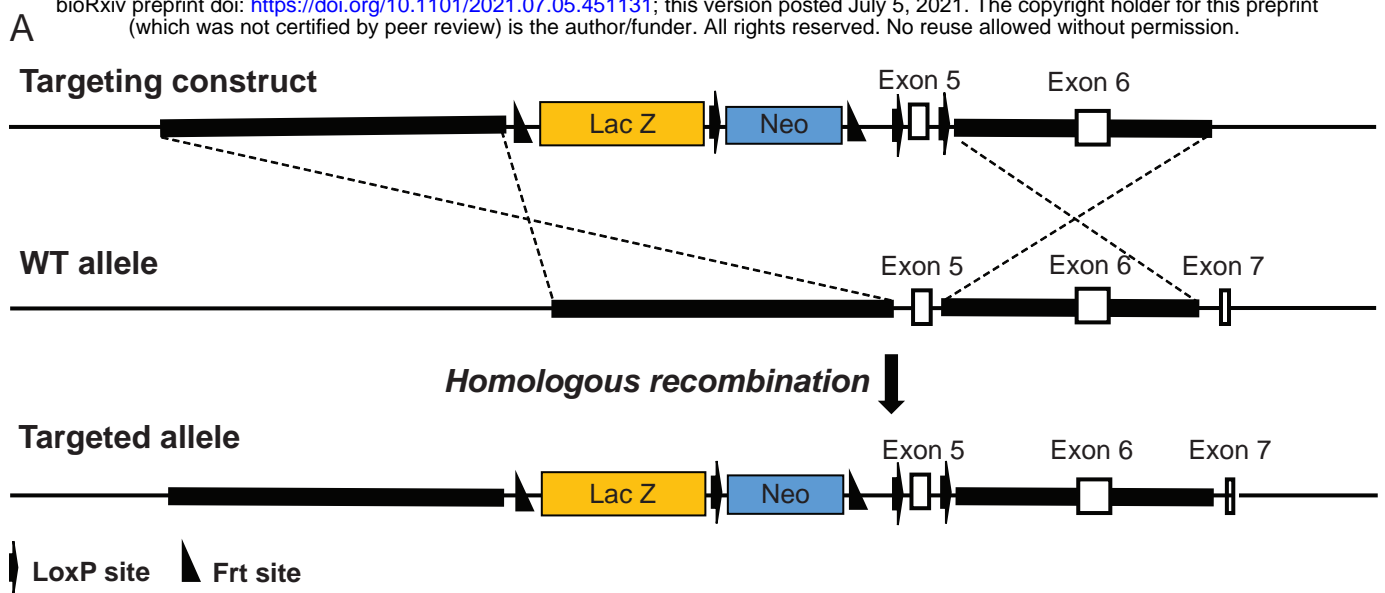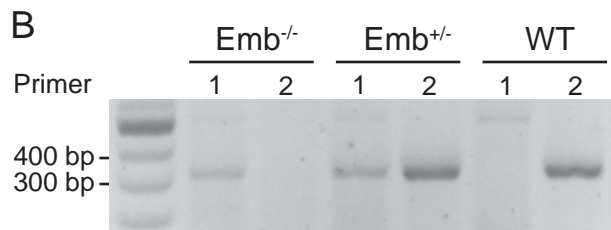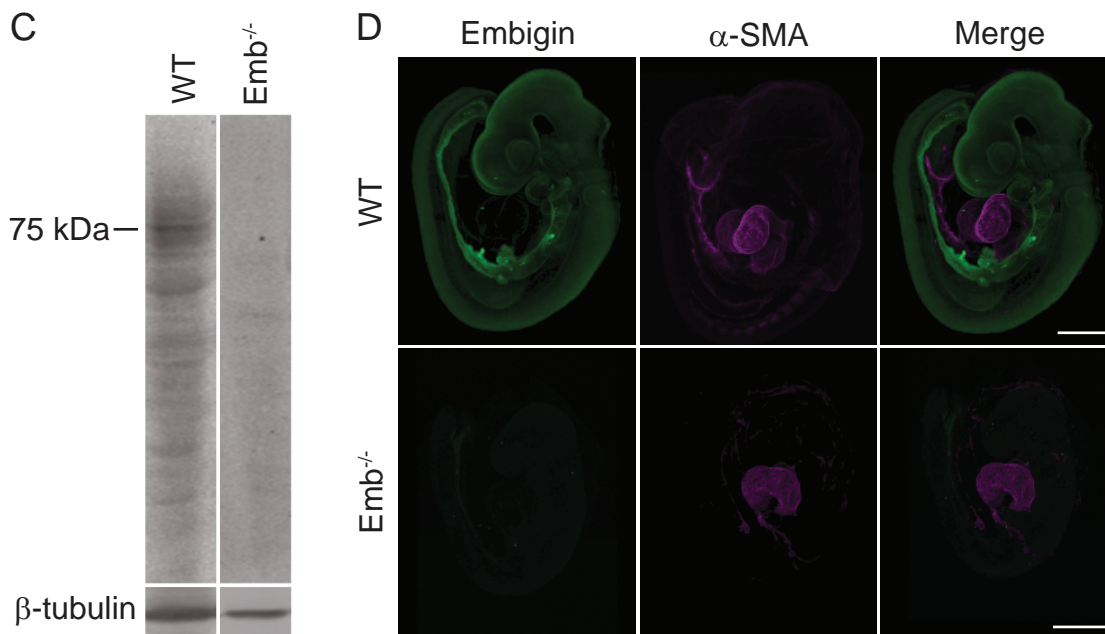

**Figure S2 – Generation of embigin knockout mice.**

(A) The knockout-first strategy was used to create knockout alleles. In the schematic presentation, the structure of the targeting construct is presented at the top, the wild type embigin allele with the coding exons 5, 6, and 7 in the middle and the homologously mutated allele below. Homologous sequences in the targeting construct are presented with a bold line; arrows represent loxP sites and triangles Frt sites.

(B) The genotypes of the mice were determined from genomic DNA by using PCR primer pair 1 to detect embigin knockout allele (354 bp) and PCR primer pair 2 to detect embigin WT allele (349 bp).

(C) The expression of embigin in the kidney tissue of WT and Emb<sup>-/-</sup> mice at the age of four months was analyzed by Western blotting. β-tubulin was used as a control.

(D) The expression of embigin in the embryo was analyzed using the whole-mount immunostaining technique. WT and Emb<sup>-/-</sup> embryos at stage E9.5 were stained with embigin and α-SMA antibodies. α-SMA was used as a positive control. Scale bars: 500 μm.

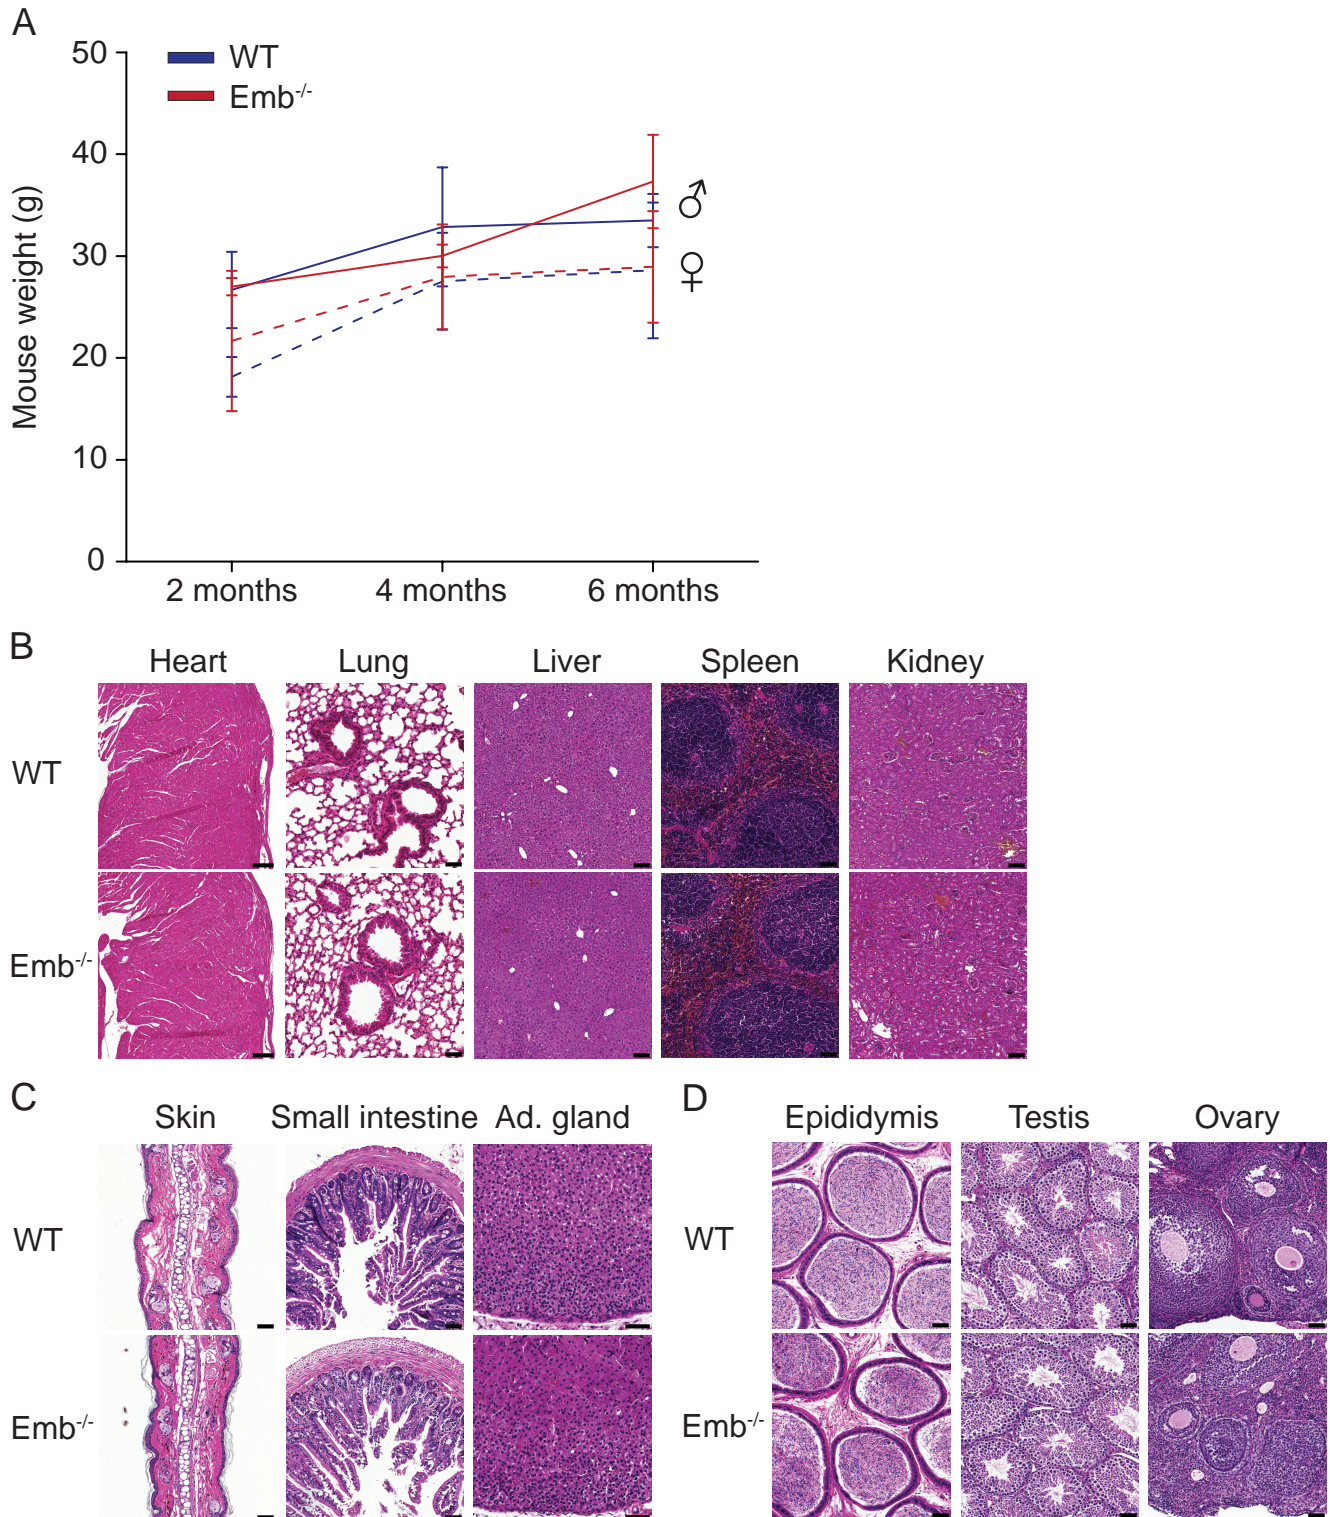

**Figure S3 – Emb<sup>-/-</sup> mice that survive into adulthood do not differ from WT mice.**

(A-D) Male and female WT and Emb<sup>-/-</sup> were examined at the age of 2, 4, or 6 months. Three mice were included in each independent study group. At each time point, the body weights of the mice were measured (A) and specific organs, heart, lung, liver, spleen, kidney, skin, small intestine, adrenal gland (Ad. gland), epididymis, testis, and ovary, were collected for histological analysis. Representative images of hematoxylin-eosin stained sections from male organs and female ovary at four months of age are shown (B-D). Scale bars: 200  $\mu$ m (heart), 100  $\mu$ m (liver and kidney), and 50  $\mu$ m (other organs).

row min  row max

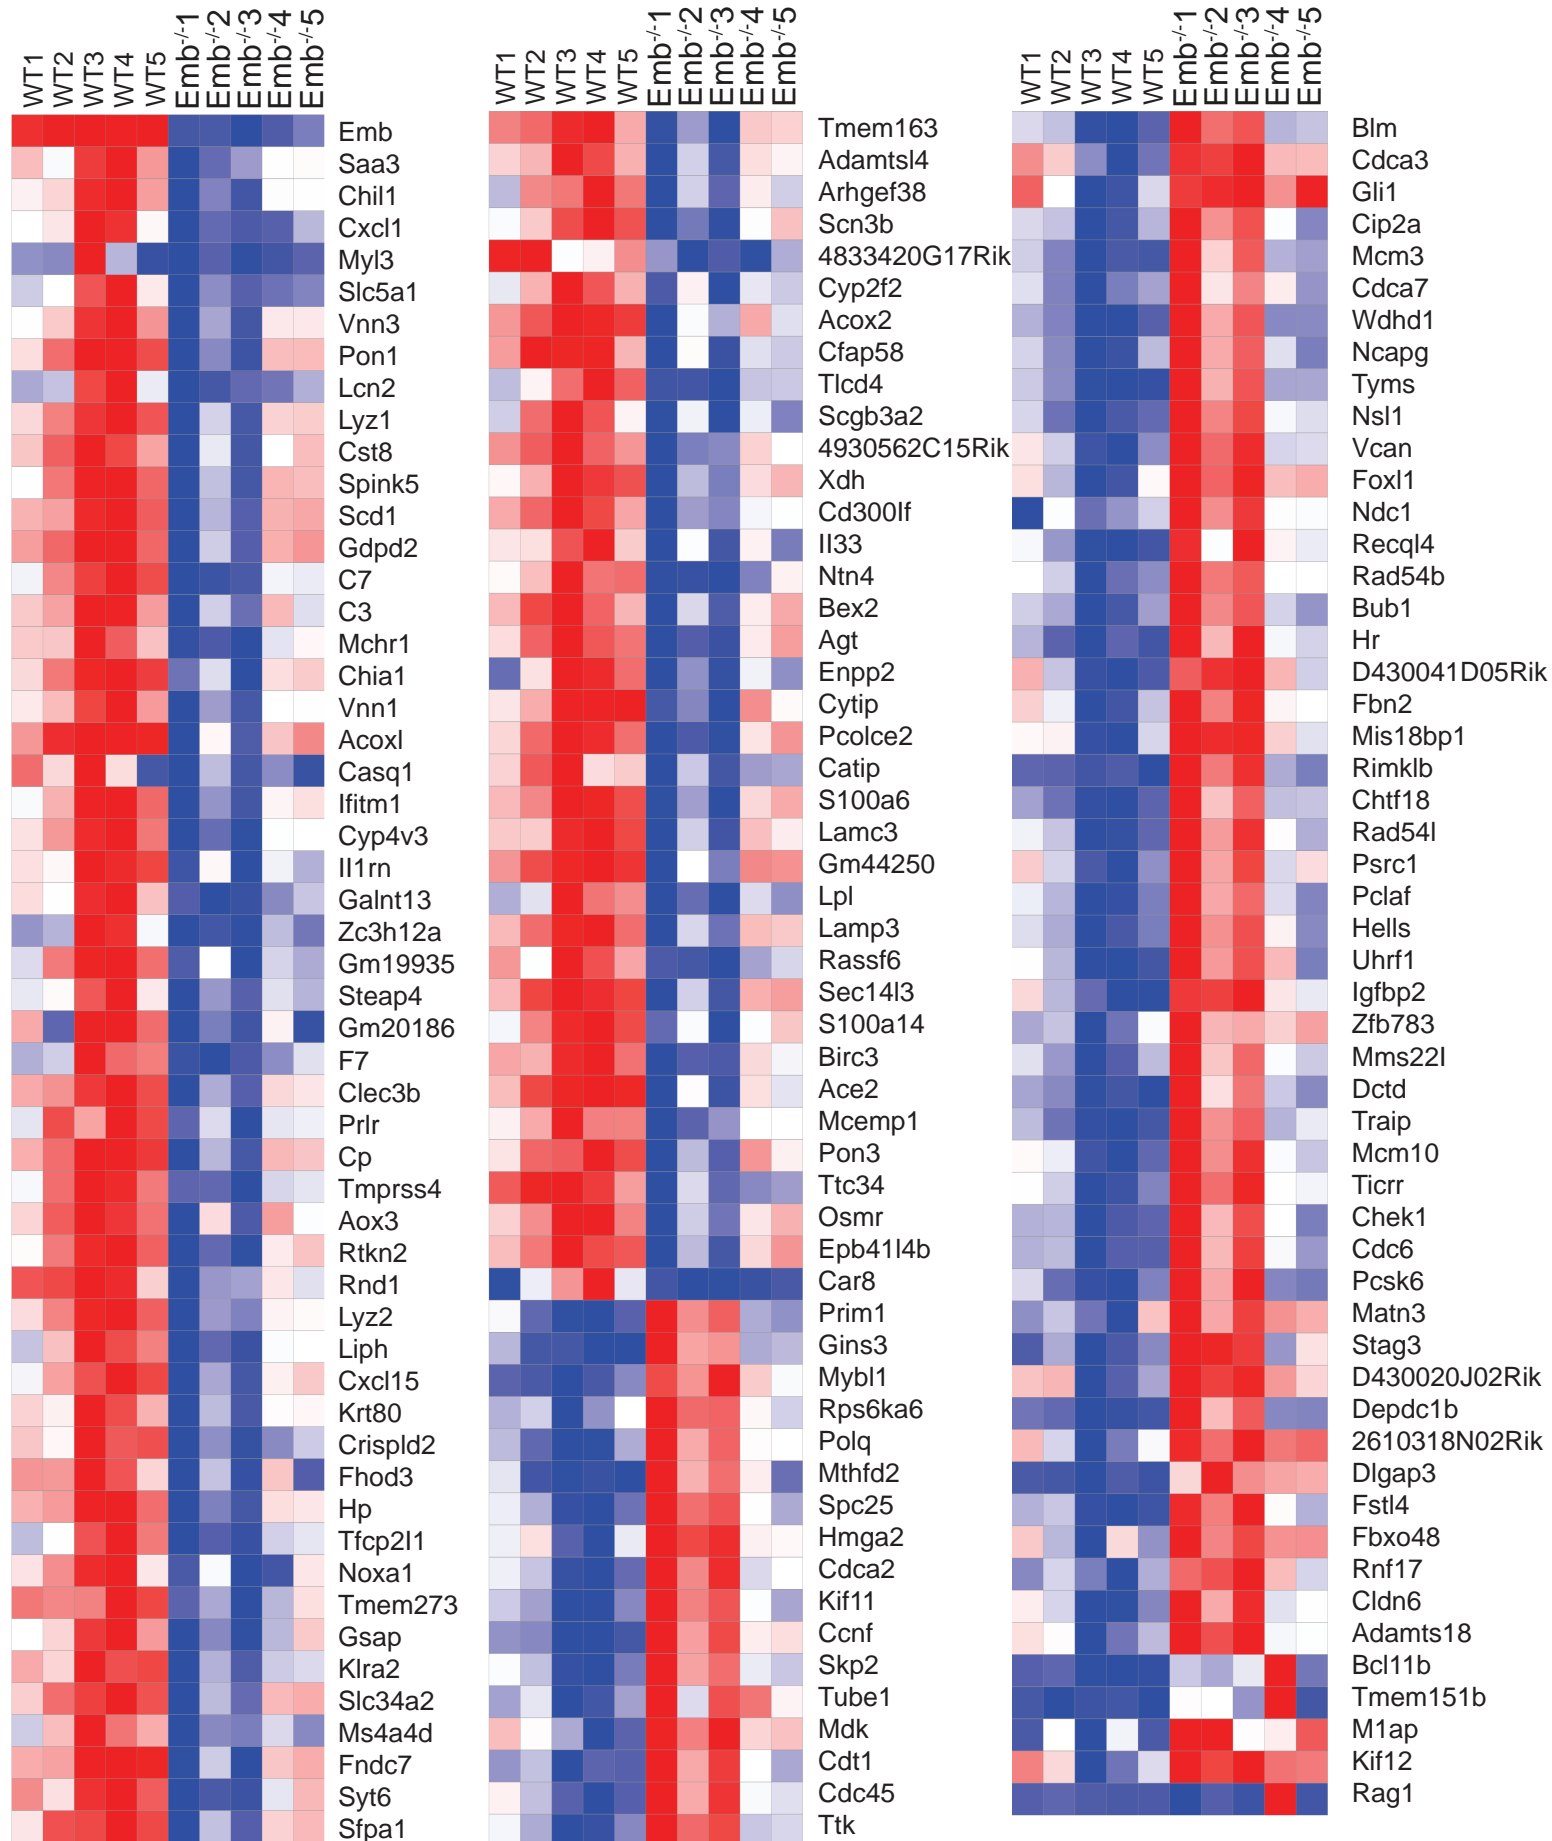

**Figure S4 – Several genes are differentially regulated in *Emb<sup>-/-</sup>* lungs at E17.5**

Heatmap of differentially expressed genes (log<sub>2</sub> of fold change above 0.6 or below -0.6 and Benjamini-Hochberg-corrected p-value < 0.05) in WT (n= 5) and *Emb<sup>-/-</sup>* (n= 5) lungs at E17.5 based on RNAseq analysis.

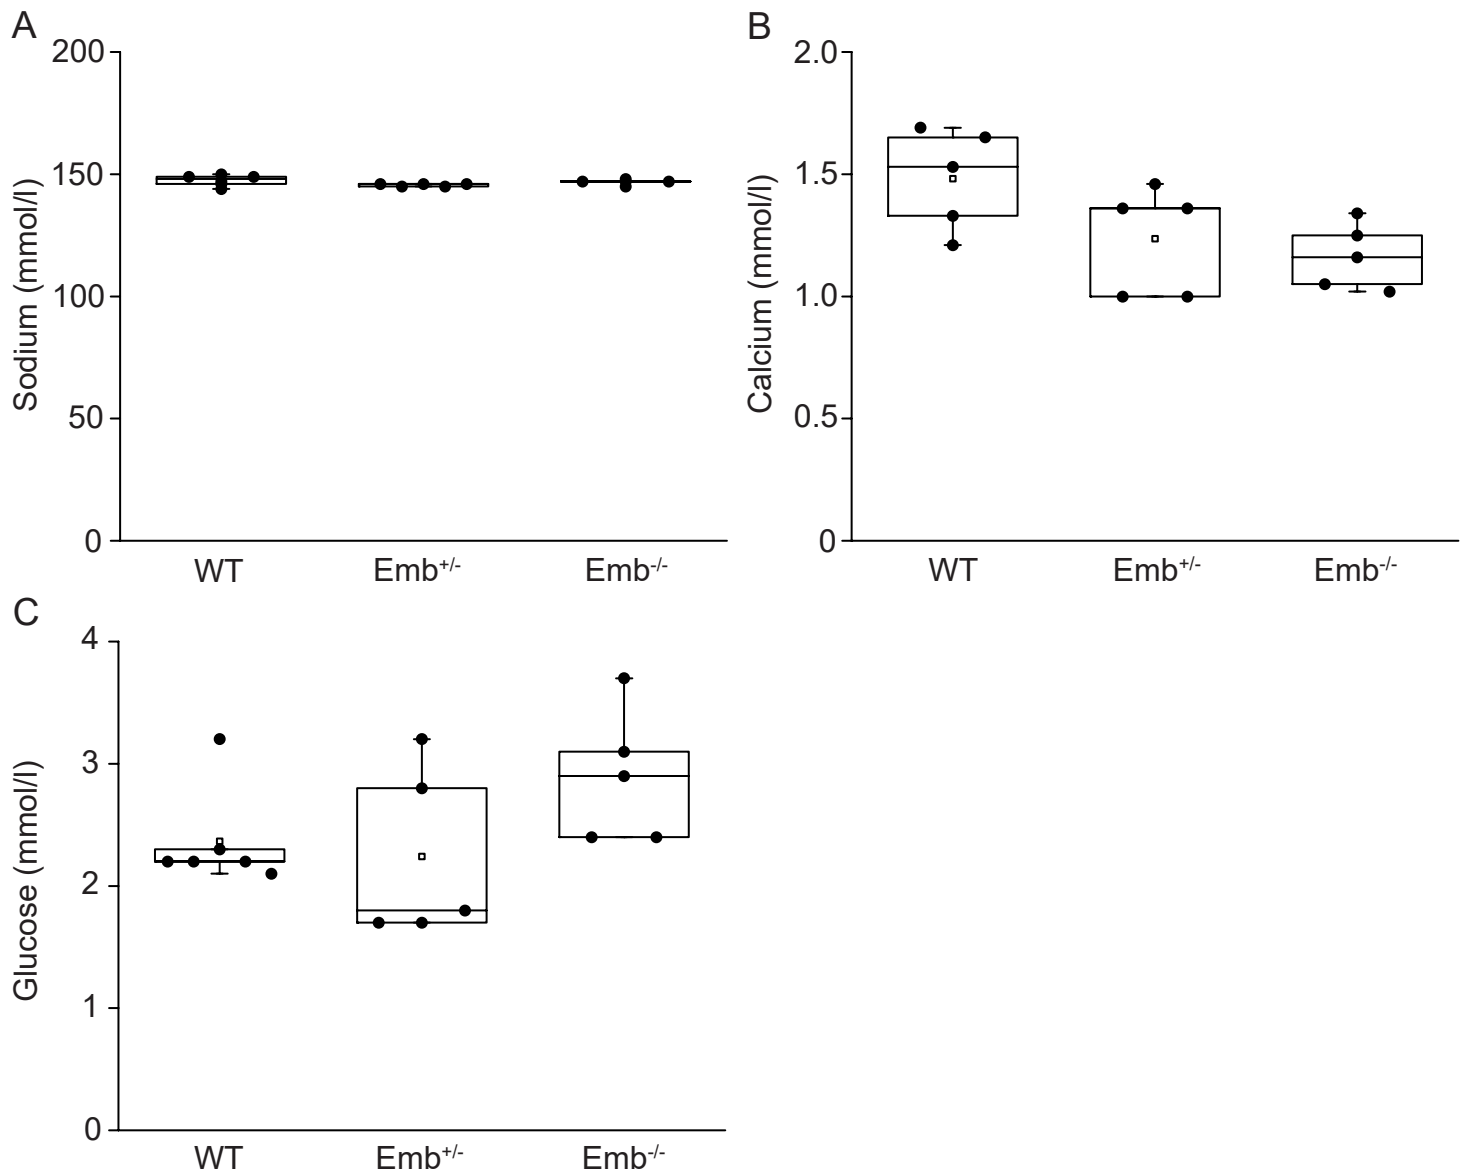

**Figure S5 – Sodium, calcium, and glucose levels do not vary in amniotic fluids at E17.5.**

Molar concentrations (mmol/l) of sodium (A), calcium (B), and glucose (C) were determined from WT, *Emb<sup>+/-</sup>*, and *Emb<sup>-/-</sup>* embryo amniotic fluids at E17.5 with VetScan Chemistry Analyzer (n = 6 for WT, and n = 5 for *Emb<sup>+/-</sup>* and *Emb<sup>-/-</sup>* mice). There were no statistically significant differences between group means determined by one-way ANOVA for calcium or by Kruskal-Wallis H-test for sodium and glucose. Data are represented as Spear style box plots. A square shows the mean value.

| Organ      | Male 2 mo     |                               | Male 4 mo     |                               | Male 6 mo     |                               |
|------------|---------------|-------------------------------|---------------|-------------------------------|---------------|-------------------------------|
|            | WT<br>(n = 3) | Emb <sup>-/-</sup><br>(n = 3) | WT<br>(n = 3) | Emb <sup>-/-</sup><br>(n = 3) | WT<br>(n = 3) | Emb <sup>-/-</sup><br>(n = 4) |
| Heart      | 0.64±0.04     | 0.78±0.10                     | 0.67±0.12     | 0.75±0.06                     | 0.58±0.07     | 0.71±0.11                     |
| Lung       | 0.66±0.02     | 0.90±0.36                     | 0.55±0.13     | 0.63±0.07                     | 0.50±0.03     | 0.66±0.19                     |
| Liver      | 5.43±0.40     | 5.47±0.90                     | 4.63±0.70     | 5.07±1.03                     | 5.03±0.69     | 5.59±0.81                     |
| Spleen     | 0.31±0.06     | 0.44±0.11                     | 0.32±0.04     | 0.49±0.21                     | 0.22±0.05     | 0.39±0.15                     |
| Kidney     | 0.82±0.05     | 0.86±0.06                     | 0.76±0.09     | 0.96±0.11                     | 0.74±0.13     | 0.81±0.21                     |
| Epididymis | 0.13±0.04     | 0.12±0.04                     | 0.09±0.01     | 0.10±0.02                     | 0.10±0.01     | 0.11±0.02                     |
| Testis     | 0.26±0.07     | 0.26±0.02                     | 0.21±0.03     | 0.29±0.02                     | 0.21±0.04     | 0.28±0.02                     |

  

| Organ  | Female 2 mo   |                               | Female 4 mo   |                               | Female 6 mo   |                               |
|--------|---------------|-------------------------------|---------------|-------------------------------|---------------|-------------------------------|
|        | WT<br>(n = 3) | Emb <sup>-/-</sup><br>(n = 3) | WT<br>(n = 3) | Emb <sup>-/-</sup><br>(n = 3) | WT<br>(n = 3) | Emb <sup>-/-</sup><br>(n = 3) |
| Heart  | 0.61±0.11     | 0.60±0.05                     | 0.47±0.07     | 0.56±0.13                     | 0.54±0.08     | 0.73±0.19                     |
| Lung   | 0.87±0.09     | 0.96±0.35                     | 0.61±0.11     | 0.61±0.21                     | 0.55±0.08     | 0.62±0.15                     |
| Liver  | 5.69±1.36     | 6.05±0.48                     | 5.19±0.28     | 4.75±1.07                     | 4.73±1.32     | 5.25±0.52                     |
| Spleen | 0.45±0.08     | 0.43±0.08                     | 0.38±0.10     | 0.49±0.17                     | 0.45±0.10     | 0.36±0.05                     |
| Kidney | 0.70±0.04     | 0.69±0.09                     | 0.55±0.09     | 0.62±0.11                     | 0.59±0.11     | 0.66±0.20                     |
| Ovary  | 0.022±0.007   | 0.026±0.009                   | 0.021±0.006   | 0.027±0.009                   | 0.015±0.002   | 0.018±0.004                   |

**Relative organ weight = organ weight / body weight \* 100 %**

**Table S1 – Emb<sup>-/-</sup> mice organ weights do not differ from WT mice.**

Male and female WT and Emb<sup>-/-</sup> heart, lung, liver, spleen, kidneys, epididymides, and testes were weighed at the age of 2, 4, or 6 months. Three to four mice were included in each independent study group. Relative organ weights were calculated by organ weight/body weight; n = number of organs analyzed.
